## 1 **Climate change and the potential distribution of *Xylella fastidiosa* in Europe**

2  
3 Martin Godefroid<sup>1,2</sup>, Astrid Cruaud<sup>1</sup>, Jean-Claude Streito<sup>1</sup>, Jean-Yves Rasplus<sup>1</sup> and Jean-  
4 Pierre Rossi<sup>1\*</sup>

5  
6 <sup>1</sup>CBGP, INRA, CIRAD, IRD, Montpellier SupAgro, Univ. Montpellier Montpellier, France.

7 <sup>2</sup>Present address: Fisheries & Oceans Canada, Pacific Biological Station, Nanaimo, B.C

8 \*corresponding author: jean-pierre.rossi@inra.fr  
9

### 10 **Abstract**

11 The bacterium *Xylella fastidiosa* (*Xf*) is a plant endophyte native to the Americas that  
12 causes worldwide concern. *Xf* has been recently detected in several regions outside its  
13 natural range including Europe. In that context, accurate estimates of its response to  
14 climate change are required to design cost-efficient and environment-friendly control  
15 strategies. In the present study, we collected data documenting the native and invaded  
16 ranges of the three main subspecies of *Xf*: *fastidiosa*, *pauca* and *multiplex*, as well as two  
17 strains of *Xf* subsp. *multiplex* recently detected in southern France (ST6 and ST7). We  
18 fitted bioclimatic species distribution models (SDMs) to forecast their potential  
19 geographic range and impact in Europe under current and future climate conditions.  
20 According to model predictions, the geographical range of *Xf* as presently reported in  
21 Europe is small compared to the large extent of suitable areas. The European regions  
22 most threatened by *Xf* encompass the Mediterranean coastal areas of Spain, Greece, Italy  
23 and France, the Atlantic coastal areas of France, Portugal and Spain as well as the south-  
24 western regions of Spain and lowlands in southern Italy. Potential distribution of the  
25 different subspecies / strains are contrasted but all are predicted to increase by 2050,  
26 which could threaten several of the most economically important wine-, olive- and fruit-  
27 producing regions of Europe, warranting the design of control strategies. Bioclimatic  
28 models also predict that the subspecies *multiplex* might represent a threat to most of  
29 Europe under current and future climate conditions. These results may serve as a basis  
30 for future design of a spatially informed European-scale integrated management  
31 strategy, including early detection surveys in plants and insect vectors, quarantine  
32 measures as well as agricultural practices.  
33

34 **Keywords** Pierce's disease, species distribution models, global change, biological  
35 invasions, risk assessment  
36

### 37 **Introduction**

38 The bacterium *Xylella fastidiosa* (*Xf*) is a plant endophyte native to the Americas, that  
39 develops in up to 300 plant species including ornamental and agricultural plants <sup>1</sup>. In its  
40 native range, *Xf* is transmitted between plants by xylem-feeding insects belonging to  
41 several families of Hemiptera (Aphrophoridae, Cercopidae, Cicadellidae, Cicadidae and  
42 Clastopteridae) <sup>2</sup>. *Xf* causes severe plant pathologies leading to huge economic losses <sup>3</sup>,  
43 including the Pierce's disease of grapevines PD: <sup>4</sup>, the olive quick decline <sup>5</sup>, the oak  
44 bacterial leaf scorch <sup>6</sup>, the phony peach disease <sup>7</sup>, the *Citrus* variegated chlorosis CVC: <sup>8</sup>  
45 and the almond leaf scorch <sup>9</sup>. As *Xf* can colonize a large number of economically  
46 important plants including vine <sup>1</sup>, its biology and the mechanisms of vector transmission  
47 have been extensively studied to design management strategies <sup>10</sup>. On the basis of  
48 genetic data obtained with Multilocus Sequence Typing MLST: <sup>11,12</sup>, *Xf* was subdivided  
49 into six subspecies (*fastidiosa*, *pauca*, *multiplex*, *sandyi*, *tashke* and *morus*). The

50 subspecies were further characterized by different geographic origins, distributions and  
51 host preferences in the Americas<sup>13-15</sup>. However, the status of the different subspecies is  
52 still a matter of debate<sup>16</sup> and only two, *fastidiosa* and *multiplex*, are formally considered  
53 valid names<sup>1,17</sup>. *Xf* subsp. *fastidiosa*<sup>18</sup> occurs in North and Central America, where it  
54 causes, among others, the harmful PD and the almond leaf scorch (ALS). Genetic  
55 analyses suggest that this subspecies originated from southern parts of Central America  
56<sup>19</sup>. The subspecies *multiplex* is widely distributed in North America (from California to  
57 western Canada and from Florida to eastern Canada), where it was detected on a wide  
58 range of host plants (e.g. oak, elm, maple, almond, sycamore, *Prunus* sp., etc.) as well as  
59 in South America<sup>20,21</sup>. The subspecies *pauca*, which causes severe diseases in *Citrus*  
60 (CVC) and coffee (Coffee Leaf Scorch:<sup>22</sup>) in South and Central America, is thought to be  
61 native to South America<sup>23</sup>. The subspecies *morus* recently proposed by Nunney et al<sup>24</sup>,  
62 occurs in California and eastern USA, where it is associated to mulberry leaf scorch. *Xf*  
63 subsp. *sandyi*, responsible for oleander leaf scorch, is distributed in California<sup>12</sup>, while  
64 the subspecies *tashke* was proposed by Randall et al<sup>25</sup> for a strain occurring on *Chitalpa*  
65 *tashkentensis* in New Mexico and Arizona. Overall, intraspecific entities of *Xf* display  
66 differences in host range suggesting that the radiation of *Xf* into multiple subspecies and  
67 strains is primarily associated to host specialization<sup>26</sup>.  
68 *Xylella fastidiosa* is now of worldwide concern as human-mediated dispersal of  
69 contaminated plant material has allowed the bacterium to spread outside its native  
70 range. In 2013, the CoDIRO strain (subsp. *pauca*) was detected on olive trees in southern  
71 part of the Apulia territory (Italy). Genetic analyses suggested that it was accidentally  
72 introduced from Costa Rica or Honduras with infected ornamental coffee plants<sup>5</sup>. Since  
73 then, *Xf* subsp. *pauca* has spread northward and killed millions of olive trees in the  
74 Apulia territory, causing unprecedented socio-economic issues. During the period 2015-  
75 2017 several subspecies and strains were detected on *ca* 30 different host plants in  
76 Southern France (PACA region) and Corsica<sup>27</sup>. According to this survey, the vast  
77 majority of plant samples were contaminated by two strains of *Xf* subsp. *multiplex*  
78 (referred here to as the French ST6 and ST7 strains). These strains are closely related to  
79 the Californian strains Dixon (ST6) and Griffin (ST7), belonging to the “almond group” of  
80 Nunney et al (2013) and were detected on numerous plant species though without  
81 evident specialization. To a lesser extent, other strains were detected in Southern  
82 France. Thus, the strain ST53 (*Xf* subsp. *pauca*) was detected on *Polygala myrtifolia* in  
83 Côte d’Azur (Menton) and on *Quercus ilex* in Corsica<sup>27</sup>. Finally, recombinants strains  
84 (ST76, ST79 or not yet fully characterized) were detected in a few plant samples. In  
85 2016, *Xf* subsp. *fastidiosa* was detected on rosemary and oleander plants overwintering  
86 in a nursery in Germany<sup>28</sup>. In 2017, Spanish plant biosecurity agencies officially  
87 confirmed the detection of *Xf* strains belonging to the subspecies *multiplex*, *pauca* and  
88 *fastidiosa* on almond trees, grapevine, cherry and plums in western parts of the Iberian  
89 Peninsula and Balearic islands<sup>29</sup>. Outside Europe, the detection of *Xf* was officially  
90 confirmed in Iran on almond trees and grapevines<sup>30</sup>, in Turkey<sup>31</sup> as well as in Taiwan  
91 on grapevines<sup>32</sup>. The severity of *Xf*-induced diseases has recently dramatically increased  
92 in several areas possibly due to global warming<sup>33</sup>. Indeed, it has been demonstrated  
93 that cold winter temperatures might affect the survival of *Xf* in xylem vessels and allow  
94 plants to partly recover from *Xf*-induced diseases ‘cold curing phenomenon’:<sup>34,35</sup>. For  
95 instance, Purcell<sup>34</sup> showed that grapevines with symptoms of PD recovered after  
96 multiple exposures to temperatures below -8°C during several hours. Further, Anas et al  
97<sup>36</sup> suggested that areas experiencing more than 2 to 3 days with minimal temperature  
98 below -12.2 °C (or alternatively 4 to 5 days below -9.9 °C) should be considered at low

99 risk for PD incidence, although these thresholds were considered too conservative by  
100 Lieth et al <sup>37</sup>. There is no doubt that estimating the potential distribution of *Xf* under  
101 current and future climate conditions will contribute to design environment-friendly  
102 and cost-efficient management strategies <sup>38</sup>. Several studies aimed to forecast the  
103 potential distribution of *Xf* in Europe <sup>39</sup> and/or all over the world <sup>40</sup>. For instance,  
104 Hoddle et al <sup>40</sup> used the CLIMEX algorithm to forecast the worldwide potential severity  
105 of PD without accounting for potential future range shifts induced by global change.  
106 Bosso et al <sup>39</sup> fitted a Maxent model to forecast the potential distribution of *Xf* subsp.  
107 *pauca* under current and future climate conditions, and concluded that climate change  
108 would not affect its future distribution of *Xf*. However, Bosso et al <sup>39</sup> calibrated their  
109 model using solely the presence records from the invaded range in Italy, a practice that  
110 is known to increase omission errors <sup>41</sup>.  
111 Here, to assist in designing efficient survey as well as appropriate management  
112 strategies of *Xf* in Europe, we modeled the potential distribution of three of its  
113 subspecies: *fastidiosa*, *pauca* and *multiplex* under current and future climate conditions.  
114 For finest estimates we also modeled the potential distribution of the two strains of the  
115 subsp. *multiplex* that seem largely distributed in Southern France (i.e. the French ST6  
116 and ST7). Finally, to go one step further, we estimated the severity of the Pierce's  
117 Disease (caused by *Xf* subsp. *fastidiosa*) in European ecosystems based on US Pierce  
118 Disease intensity/occurrence maps provided by A. Purcell (available in Kamas et al <sup>42</sup>  
119 and in Anas et al <sup>36</sup>).

120

## 121 **Material & Methods**

122

### 123 *Distribution data*

124

125 We collected occurrence data for subspecies *pauca* and *multiplex* in both their native  
126 and invaded ranges from the scientific literature, field surveys and public databases (Fig.  
127 1). We also used data on the distribution of the strains ST6 and ST7 in France that were  
128 collected in 2015-2017 and stored in the French national database managed by the  
129 French Agency for Food, Environmental and Occupational Health & Safety (ANSES) (Fig.  
130 1B). For the subspecies *fastidiosa*, we randomly generated 400 occurrences within its  
131 traditional range and assigned to each record a PD severity index (index 1: low severity;  
132 index 2: moderate severity; index 3: high severity) according to PD intensity maps  
133 provided by A. Purcell (available in Anas et al <sup>36</sup> and Kamas et al <sup>42</sup>) (Fig. 1A). High  
134 severity regions comprise Florida, south of Alabama, Texas, Louisiana and Mississippi  
135 states as well as Los Angeles basin in California and coastal areas of South and North  
136 Carolina (Fig. 1A). Moderate severity areas comprise north of Alabama, Georgia, Texas,  
137 Louisiana and Mississippi states as well as some wine-producing regions of California  
138 (Napa valley, Sonoma valley, Santa Clara valley) where severe PD outbreaks occurred  
139 during the 20<sup>th</sup> century even though it was an unusual phenomenon. Low severity  
140 regions encompass most of Virginia, Oklahoma, North Texas, Kentucky etc. as well as  
141 localities in Washington State <sup>34</sup>. Pierce's disease symptoms associated to the presence  
142 of *Xf* were recently detected in West Virginia <sup>33</sup>, Oklahoma <sup>43</sup> and high elevation regions  
143 of Texas <sup>42</sup>. The emergence of PD in these regions may, however, have been induced by  
144 the recent increase of temperatures occurring in the late 1990's and in 2000's. We  
145 deliberately considered these regions as low-risk areas because climate descriptors  
146 used in the present study represent average climate conditions for the 1970-2000

147 period (see below) and do not account for temperature changes that occurred at the  
148 very end of the 20<sup>th</sup> century and the beginning of the 21<sup>th</sup> century.

149

### 150 *Bioclimatic descriptors*

151

152 We used a set of bioclimatic descriptors hosted in the Worldclim database bio1 to bio19  
153 see <sup>44</sup>. We used raster layers of 2.5-minute spatial resolution, which corresponds to  
154 about 4.5 km at the equator. The data come in the form of a raster map and represent  
155 the average climate conditions for the period 1970-2000. We estimated the future  
156 potential distributions of the different subspecies of *Xf* in 2050 and 2070 using the  
157 Model for Interdisciplinary Research on Climate version 5 MIROC5 <sup>45</sup>. These predictions  
158 of future temperature and precipitation rank among the most reliable according to  
159 model evaluation procedures used in AR5 of IPCC <sup>46</sup>. We used two different climatic  
160 datasets relative to the representative concentration pathways RCP4.5 and RCP8.5,  
161 which assume moderate and extreme global warming, respectively <sup>47</sup>.

162

### 163 *Models*

164

165 The PD severity index being an ordinal categorical variable (1<2<3) it was modeled  
166 using a cumulative link model (CLM) also called ordinal regression models, or  
167 proportional odds models <sup>48</sup>. The CLM analyses the relationship between a set of  
168 independent variables (the climate descriptors) and an ordinal dependent variable  
169 consisting in the PD severity index. The CLM was fitted using a dataset corresponding to  
170 Pierce's disease intensity in the US (Fig. 1A). It was then used to compute the spatial  
171 distribution of the probabilities that the different classes of index occur in Europe. CLM  
172 fit and predictions were carried out using the R software version 3.3.3 <sup>49</sup> and the R  
173 packages MASS <sup>50</sup> and ordinal <sup>51</sup>.

174 The potential distribution of *Xf* subsp. *pauca*, *multiplex* and the French ST6/ST7 were  
175 estimated using species distribution modeling. Species distribution models establish  
176 mathematical species-environment relationships using presence records and  
177 environmental descriptors in order to assess the potential distribution of species or map  
178 the habitat suitability <sup>52</sup>. We used two presence-only approaches namely Bioclim <sup>53,54</sup>  
179 and Domain <sup>55</sup>. These algorithms are climatic envelope approaches. As such, they are  
180 based on presence records and do not make any assumptions about the absence of the  
181 organism under study. We selected these approaches because they are well suited to  
182 poorly documented species for which reliable absences are unavailable <sup>54,56</sup>. In addition,  
183 we deliberately did not fit SDMs which rely on complex mathematical relationships  
184 among descriptors such as e.g. Maxent: <sup>57</sup> as we used only a few climate descriptors (see  
185 below).

186 Both Bioclim and Domain yield an index of habitat suitability that can be categorized to  
187 form a binary map (species presence vs. absence or suitable vs. unsuitable habitat). We  
188 used the lowest presence threshold (LPT) <sup>58</sup> i.e. the lower value of predicted climatic  
189 suitability associated to presence records. SDM fit and predictions were carried out  
190 using the R package dismo <sup>59</sup>.

191

192

193

194

195

196 *Procedure to select climate predictors*

197

198 The models were intentionally fitted using a limited number of ecologically relevant  
199 climate descriptors to avoid model over-parameterization, which is a recommended  
200 practice in the context of invasion risk assessment <sup>60</sup>.

201 *CLM*. Although *Xf* geographical distribution appears to be primarily driven by minimum  
202 temperatures, the dynamics of the plant-pathogen-vector system is complex <sup>61</sup> and  
203 rainfall may impact the severity of the disease by affecting the bacterium pathogenicity  
204 or the intensity of the vection by insects.

205 The CLM was fitted using a set of climate variables that represent possible significant  
206 ecological stressors (maximum temperature of warmest month (bio5), minimum  
207 temperature of coldest month (bio6), mean temperature of warmest quarter (bio10),  
208 mean temperature of coldest quarter (bio11), precipitation of wettest quarter (bio16),  
209 precipitation of driest quarter (bio17), precipitation of warmest quarter (bio18) and  
210 precipitation of coldest quarter (bio19)). We used a stepwise model selection by AIC to  
211 identify the best performing variable subset, which finally comprised (bio10: mean  
212 temperature of warmest quarter, bio11: mean temperature of coldest quarter and  
213 bio18: precipitation of warmest quarter). Because the impact of precipitations upon PD  
214 severity pattern at large spatial scales is not well documented we performed the  
215 computations using the full model (bio10, bio11 and bio18) and a model comprising  
216 only the temperature predictors (bio10 and bio11).

217

218 *SDM*. A first step consisted into fitting and evaluating both Bioclim and Domain models  
219 using 10 different climate datasets combining maximal and minimal temperatures  
220 descriptors (bio5: maximum temperature of the warmest month; bio6: minimum  
221 temperature of the coldest month; bio10: mean temperature of the warmest quarter;  
222 bio11: mean temperature of the coldest quarter) (Table 1). We did not include  
223 descriptors of rainfall since we were interested in modeling distribution only (not  
224 severity) <sup>34</sup>. At this stage, models were fitted using only the occurrences available in the  
225 native area of each subspecies or French occurrences of the ST6 and ST7 strains (Fig. 1B,  
226 C, D). This allowed us to evaluate the transferability of each model by calculating the  
227 proportion of actual presences in the invaded range correctly predicted using the LPT <sup>58</sup>  
228 i.e. model sensitivity. As a second evaluation of model transferability, we calculated the  
229 area under the curve of the receiver operator curve (AUC) from a dataset encompassing  
230 occurrences available in Europe as well as 10,000 pseudo-absences randomly generated  
231 across the European territory. For a given subspecies, the climatic dataset associated to  
232 models showing poor transferability were discarded from the study. The selected  
233 climate dataset were then used to fit Bioclim and Domain models using the occurrences  
234 available in both native and invaded ranges as recommended by various authors e.g.  
235 Broennimann and Guisan <sup>41</sup>. The models were used to estimate the habitat suitability  
236 across Europe and binary maps were generated using the threshold detailed above. For  
237 each taxonomic unit we finally constructed a suitability map by averaging the  
238 predictions of models fitted with each selected set of climatic descriptors ensemble  
239 forecasting: <sup>62,63</sup>.

240

241 *Refining species distribution models' predictions*

242

243 Some points in Europe may be associated to climate conditions that are not encountered  
244 within the range of conditions characterizing the set of reference points i.e. within the

245 native and invaded areas. In such situations, using the species distribution models to  
246 predict habitat suitability in such novel habitats can be misleading<sup>64</sup>. Elith et al<sup>64</sup>  
247 introduced the multivariate environmental similarity surface (MESS) to quantify how  
248 similar a point is to a reference set of points with respect to a set of predictor variables.  
249 Negative values of the MESS index indicate sites where at least one variable has a value  
250 lying outside the range of environments over the reference set. We computed the MESS  
251 index over Europe with reference to the occurrence dataset used to fit each species  
252 distribution model. We further restricted the model predictions to areas where the  
253 index was positive. We used a MESS index computed with the variable bio11 (mean  
254 temperature of coldest quarter) to refine the CLM predictions because the impact of  
255 winter temperatures on PD dynamics is very well documented<sup>34,35,65</sup>. MESS  
256 computations were carried out using the R package `dismo`<sup>59</sup>. All graphical outputs were  
257 produced using the R packages `ggplot2`<sup>66</sup> and `cowplot`<sup>67</sup>.

258

## 259 **Results**

260

### 261 *Pierce's disease severity index*

262

263 The stepwise-selected model comprised three bioclimatic descriptors: bio10: mean  
264 temperature of warmest quarter, bio11: mean temperature of coldest quarter and  
265 bio18: precipitation of warmest quarter. The variable contribution was highly  
266 significant in all cases ( $p < 10^{-3}$ ) and the coefficients were -19.4 (bio10), 77.6 (bio11) and  
267 3.5 (bio18). The resulting model was used to compute the values of the PD severity  
268 index across North America and Europe using climatic dataset corresponding to the  
269 period 1970-2000. In North America the MESS index revealed that areas north of 35  
270 decimal degrees latitude were associated to strongly negative index (Fig. S1). In Europe,  
271 low index values were observed in north-eastern areas as well as in the Alps and the  
272 Pyrenees (Fig. S2). These areas were discarded from further interpretation and have  
273 been subsequently depicted in grey in the maps shown in Fig. 2. The Figs 2A and S3  
274 show the model predictions for the three levels of severity in Europe and North America  
275 for the period 1970-2000 respectively.

276 The CLM predicted a risk of moderate to highly severe PD in multiple lowlands and  
277 coastal areas of the Mediterranean regions (Spain, Italy, Balearic islands and North  
278 Africa) as well as along the Atlantic coasts of France, Northern Spain and Portugal (Fig.  
279 2A). A low to moderate severity of PD was also predicted in the Atlantic coasts of France,  
280 lowlands of northern Italy, and central Spain. High severity was predicted in Sicilia  
281 (Italy), and along both the Atlantic and Mediterranean coasts of Spain.

282 Using the model to estimate the PD severity index according to different climate change  
283 scenarios led to the maps displayed in Fig. 2B and 2C for 2050 and Fig. S4 B and C for  
284 2070. In each case, the MESS index was recomputed on the basis of the present and  
285 future climate conditions. Estimations for 2050 indicate an increased PD severity in  
286 south Italy, Corsica and Sardinia either with the concentration pathways RCP4.5 or the  
287 RCP8.5 (Fig. 2B, and 2C). The estimates for 2070 are pretty much similar (Fig. S4).

288 The CLM fitted with only bio10 and bio11 led to the results showed in Fig. S5 and S6.  
289 The main differences are that the Atlantic coasts of France, Ireland and west England are  
290 associated to severity index of 1 whereas the model including bio18 predicted a severity  
291 of 2 (Fig. S5). A similar pattern is observed for the predictions in 2070 (Figs S4 and S6).

292

293

## 294 *Potential distribution of Xf subspecies pauca and multiplex*

295

296 Both Bioclim and Domain fitted using climate datasets #1, #4 and #7 yielded high  
297 transferability measures (AUC superior to 0.85 and sensitivity = 1) in the case of the  
298 subsp. *pauca* (Table 1). These datasets were therefore retained for further analyses. For  
299 the subsp. *multiplex* we selected 3 climate datasets (#2, #6 and #9) associated to AUC  
300 values >0.85 and a sensibility of 0.999 (Table 1).

301 Regarding the subspecies *pauca*, the models showed that climatically suitable  
302 environments in Europe only correspond to small well-delimited areas in South  
303 Portugal and Spain, Balearic Islands, Sicilia and North Africa (Fig. 3A). There was a  
304 marked agreement between the models that all indicated very favorable environment in  
305 these areas (Fig. 3D). It is worth noting that the areas associated to negative MESS index  
306 values are very large (shaded areas in maps; i.e. areas experiencing climate conditions  
307 absent from the dataset used to calibrate the model and for which no prediction was  
308 made). This conveys the fact the subsp. *pauca* originates from South America (Fig. 1D)  
309 and is associated to tropical environments. Suitable environments in Europe are  
310 restricted to warmest environments around the Mediterranean Sea. The models predict  
311 changes in the location of suitable areas in Europe by 2050 (Fig. 3B-F). Areas at risk  
312 would include northern coast of Spain, south France and Tyrrhenian coast of Italy. There  
313 is no marked differences according to the scenario examined (Fig. 3) and a similar  
314 pattern is expected in 2070 (Fig. S7) except for Italy where climate conditions may  
315 become unfavorable according to scenario 8.5 (Fig S7F).

316 The situation is different for the subspecies *multiplex* which is natively distributed  
317 across North America (Fig. 1C) and for which the models depicted suitable conditions in  
318 most of Europe except high-elevation areas and cold northern regions (Fig. 4). The  
319 expected impacts of climate change are limited and mostly concern South Spain where  
320 the conditions are expected to become unfavorable by 2050 and North part of Europe  
321 that are predicted to become more favorable by 2050 (Fig. 4 B to F) and 2070 (Fig. S8).

322 The potential distribution of the French strains ST6 and ST7 is localized to  
323 Mediterranean areas (Corsica, Sardinia, Sicilia and coastal areas of Italy and France)  
324 (Fig. 5A, D). Suitable conditions are also present in the Atlantic coasts of Portugal and in  
325 South West France. A shift in distribution is expected to occur by 2050 (Fig. 5B to F and  
326 Fig. S9). Favorable conditions are expected to extend northward while areas currently  
327 suitable such as South Western France are expected to become unfavorable. All models  
328 indicate that the Spanish Atlantic coast (Galicia, Asturias, Cantabria and Basque country)  
329 is expected to become climatically suitable by 2050.

330

## 331 **Discussion**

332

### 333 *Geographical distribution and possible impacts in Europe*

334

335 In a rapidly changing world, the design of pest control strategies (e.g. early detection  
336 surveys and planning of phytosanitary measures) should ideally rely on accurate  
337 estimates of the potential distribution and/or impact of pest species as well as their  
338 responses to climate change<sup>38</sup>. In the present study, bioclimatic models predicted that a  
339 large part of the Mediterranean lowlands and Atlantic coastal areas are seriously  
340 threatened by *Xf* subsp. *fastidiosa*, *multiplex* and *pauca*. A low to moderate impact is also  
341 expected in northern and eastern regions of Europe (North-eastern France, Belgium, the  
342 Netherlands, Germany, Scandinavia, the Baltic region, Poland, Austria, Switzerland, etc.)

343 that experience lower minimal temperature in winter but may nevertheless presumably  
344 host *Xf* subsp. *multiplex*.

345 Models display good evaluation measures and predict moderate to high climatic  
346 suitability in all European areas where symptomatic plants are currently infected by the  
347 subspecies *fastidiosa*, *pauca* or *multiplex* (e.g. Balearic Islands, lowlands of Corsica  
348 island, south-eastern France and the Apulia region). This suggests that risk maps  
349 provided in the present study are reliable for the design of surveys, including ‘spy  
350 insects’ survey<sup>68,69</sup>. They may also be helpful to anticipate the spread of the different  
351 subspecies and provide guidance on which areas should be targeted for an analysis of  
352 local communities of potential vectors and host plants to design management strategies  
353 and research projects.

354 Our results show that the subspecies/strains of *Xf* studied here might significantly  
355 expand in the near future, irrespective of climate change. For example, the ST6 and ST7  
356 strains (subsp. *multiplex*) present in Corsica and southern France have a large potential  
357 for expansion, whose dynamics actually depends more on plant exchanges and disease  
358 management than on climate suitability *per se*. The subspecies *multiplex* is associated to  
359 economically important plants such as almonds and olives<sup>26</sup> but may also colonize  
360 multiple ornamental plants. Its present potential distribution in Europe extends far  
361 beyond areas where the subspecies has been reported and comprises Portugal, Italy,  
362 and both South and South-western France suggesting possible important economical  
363 losses.

364 The subspecies *fastidiosa*, which has been currently reported from a limited number of  
365 localities, could encounter favorable climate conditions in various areas of Europe. The  
366 model estimation of areas with a risk of PD highlights strategic wine-growing areas in  
367 different countries. Notably, the present estimates of the potential impact of the *subsp.*  
368 *fastidiosa* are consistent with the risk maps provided by Hoddle et al<sup>40</sup> and A. Purcell  
369 (available in Anas et al<sup>36</sup>). The case of subsp. *pauca* is somewhat different. Most of the  
370 European occurrences are known from southern Italy and the Balearic Islands and the  
371 potential distribution of this subspecies appears to be limited. This is not surprising  
372 given that *Xf* subsp. *pauca* is native from South America and occupies a climatic niche  
373 that mostly corresponds to areas located around the Mediterranean basin. Nevertheless,  
374 southern Spain, Portugal, Sicilia and North Africa that are areas where growing olive  
375 trees is multiseccular offer suitable conditions, which potentially implies huge socio-  
376 economic impacts. One factor that proved to be critical for some diseases is the  
377 distribution/availability of vectors and hosts. Here, none of these factors is limiting since  
378 *Xf* is capable of colonizing a vast array of plants present in Europe and *Philaenus*  
379 *spumarius*, the only European vector identified so far<sup>70,71</sup>, occurs across the whole  
380 continent<sup>69</sup>.

381 Because we used the MESS index to discard regions experiencing climate conditions  
382 absent from the dataset used to calibrate the model, our estimations of potential  
383 distributions are conservative. The CLM showed a positive effect of higher temperatures  
384 during the coldest quarter (variable bio11 associated to a positive coefficient) on the  
385 severity index which may indicate to a lower “cold curing” effect<sup>34,65</sup>. Absence of  
386 estimation of the potential distribution of *Xf* (all subspecies) or of the PD severity index  
387 (*Xf* subsp. *fastidiosa*) (i.e. shaded areas of the maps) does not mean that the bacterium is  
388 unable to develop but rather that evaluating the risk is difficult. For example, the  
389 potential impact of *Xf* in areas experiencing extremely high temperatures in summer  
390 (e.g. southern and central Spain) remains largely uncertain as the impact of extreme  
391 heat on *Xf* and on the behavior of insect vectors is still poorly known<sup>61</sup>. We report a



392 negative coefficient for the variable bio10 (mean temperature of the warmest quarter)  
393 suggesting that PD severity would be negatively related to high temperatures during  
394 summer. Although warm spring and summer temperatures enhance multiplication of *Xf*  
395 in plants, it has been showed that *Xf* populations decrease in grapevines exposed to  
396 temperatures above 37°C<sup>35</sup>. As southern and central Spain frequently experience  
397 temperatures above 40°C in summer, further field and laboratory experiments are  
398 required to improve our estimation of the potential impact of *Xf* in these regions.  
399 Another point requiring clarification is the effect of precipitation during the warmest  
400 quarter that appears to be significant in the CLM. Precipitation may have direct impacts  
401 on the dynamics of the relationship between *Xf* and its host as well as indirect effects  
402 through the relationships with the insect vectors.

403

#### 404 *Climate change and possible range shifts*

405

406 Our results clearly indicate that climate change may strongly impact the distribution of  
407 *Xf* in Europe. Indeed, as “cold curing” appears to be the main mechanism explaining the  
408 lower impact of *Xf* in colder regions, an increase of winter temperatures should make  
409 these regions more suitable for *Xf* in the next decades<sup>34,35,65</sup>. We report possible  
410 changes in the potential distribution of the subspecies *multiplex* with a northward  
411 expansion by 2070. The potential distribution of the French strains ST6 and ST7 is even  
412 more impacted with a gradual shift of suitable areas from Southern France, Italy and  
413 Portugal towards Northern France, Belgium, Netherlands and South England. The  
414 suitable areas for *Xf* subsp. *pauca* are expected to slightly extend to the Mediterranean  
415 coastal areas of Spain and France. The expected impact of climate change on the severity  
416 index of the PD is less marked and mostly correspond to an increased PD severity in  
417 south Italy, Corsica and Sardinia.

418 Overall, these results obtained on the different subspecies clearly indicate that climate  
419 change will alter areas at risk for invasion by *Xf* in Europe. Given that both the  
420 concentration pathways RCP4.5 and RCP8.5 led to concordant predictions, it appears  
421 sound to expect such changes even if the global warming is kept to a moderate level.  
422 SDMs showed that the subspecies *multiplex* displays a wider temperature tolerance and  
423 could threaten most of the European continent now and in the future. This is not  
424 surprising as this subspecies infects elms in regions of Canada characterized by low  
425 winter temperatures<sup>72</sup>. This broad tolerance to cold is not known for other subspecies  
426 and it is still unclear whether realized niche divergence among subspecies reflects  
427 inherent differences in thermal tolerances or rather host-pathogen interactions as it was  
428 observed for *Ralstonia solanacearum*<sup>73</sup>. More investigations would help a better  
429 understanding of the effect of temperatures on the different strains of *Xf*. It is  
430 noteworthy that both present and future distributions show several areas of potential  
431 co-occurrence. This may have important implications as it may increase the risk of  
432 intersubspecific homologous recombination (IHR).

433

#### 434 *Limits and opportunities for risk assessment*

435

436 Maps of habitat suitability and their declination with regards to future climate  
437 conditions should be guardedly interpreted as they are derived from correlative tools  
438 that depict the *realized* niche of species i.e. a subset of the *fundamental* environmental  
439 tolerances constrained by biotic interactions and dispersal limits<sup>74</sup>. In addition, we  
440 cannot rule out the possibility that this study overestimates the potential distribution of

441 the subspecies *pauca* and *multiplex*, and of the French strains ST6 and ST7 under future  
442 climate conditions. Indeed, time-periods associated to occurrences and climate  
443 descriptors dataset do not perfectly overlap. The models were fitted with climate  
444 descriptors that represent average climate conditions for the 1970-2000 period, while  
445 most presence records were collected after 2000 in a period characterized by milder  
446 winter temperatures. Moreover, as we deliberately fitted simple climate-envelope  
447 approaches such as Bioclim and Domain based on few climate descriptors to avoid  
448 model over-parameterization and/or extrapolation and enhance model transferability,  
449 we cannot exclude that bioclimatic models presented in the study do not capture the  
450 entire range of environmental tolerances and do not depict the complexity of the  
451 climatic niche of *Xf* as well as potential interactions between climate descriptors. Better  
452 models hence better risk assessment could be obtained if the amount of occurrence data  
453 could be increased. True absences i.e. locations where the environmental conditions are  
454 unsuitable for *Xf* to survive, would be particularly precious because they would allow  
455 using powerful approaches such as the generalized linear model<sup>52</sup>. Finally, the possible  
456 adaptation of the subspecies of *Xf* to environmental constraints met in European  
457 ecosystems is another important and unknown factor of uncertainties. For example, the  
458 potential of recombinant strains to adapt should be addressed in the near future.  
459 Finally, it is worth noting that bioclimatic models predict climatic suitability of a  
460 geographic region rather than a proper risk of *Xf*-induced disease incidence. To predict  
461 the proper severity of *Xf*-induced diseases in a given locality, statistical models should  
462 account for many additional factors playing a role in *Xf* epidemiology, including e.g.  
463 microclimate conditions, inter-annual climate variability, landscape structure and the  
464 spatio-temporal structure of the community of potential vectors. Although recent  
465 entomological studies identified the meadow spittlebug *P. spumarius* as the main vector  
466 of *Xf* in Italy<sup>70,71</sup>, a better knowledge of all European vectors capable of transmitting *Xf*  
467 from plant to plant as well as their ecological characteristics (geographic range,  
468 efficiency in *Xf* transmission, demography, overwintering stage, etc.) is needed<sup>75</sup>. In this  
469 context, our estimates could allow to design cost-efficient vector surveys, with priority  
470 given to geographic regions predicted as highly climatically suitable for *Xf*. The study by  
471 Cruaud et al<sup>69</sup> provides a good insight into how species distribution modeling and DNA  
472 sequencing approaches may be combined for an accurate monitoring of the range of *Xf*  
473 and its vectors in Europe. We believe that bioclimatic models are promising tools to help  
474 designing research experiments, control strategies as well as political decisions at the  
475 European scale.

476

## 477 **Conclusions/highlights**

478

479 Species distribution models all indicate that the geographical range of *Xf* as presently  
480 reported in Europe is small compared to the large extent of suitable areas. This is true  
481 for all studied subspecies of *Xf* although the subspecies *pauca* appears to have a smaller  
482 potential range possibly because of its Neotropical origin. Although caution is needed in  
483 interpreting spatial projections because uncertainties in future climate conditions  
484 themselves and because uncertainties associated to the predictions of the species  
485 distribution models are difficult to assess, we showed that climate change will probably  
486 affect the future distribution of the bacterium by 2050 and then 2070. Last but not least,  
487 *Xf* has a certain potential to adapt for the specific climate and biotic interactions (hosts,  
488 vectors) present in Europe. This potential is unknown but could nevertheless lead to  
489 marked divergence between its future geographical distribution and the picture we have

490 of it today. However, our current knowledge allows proposing different research  
491 avenues to better understand and anticipate the possible expansion of *Xf* in Europe.  
492 European areas at risk encompass diversified (sub)natural ecosystems as well as agro-  
493 ecosystems in which an important research effort should be made to decipher the host  
494 plants – insect vectors – bacterium interactions<sup>76</sup>. Only in this way could we develop an  
495 appropriate and efficient strategy to deal with *Xf* in the coming years.

496

497

## 498 **References**

499

- 500 1 EFSA. Scientific Opinion on the risks to plant health posed by *Xylella fastidiosa* in  
501 the EU territory, with the identification and evaluation of risk reduction options.  
502 *EFSA Journal* **13**, 3989 (2015).
- 503 2 Janse, J. & Obradovic, A. *Xylella fastidiosa*: its biology, diagnosis, control and risks.  
504 *Journal of Plant Pathology*, S35-S48 (2010).
- 505 3 Tumber, K., Alston, J. & Fuller, K. Pierce's disease costs California \$104 million per  
506 year. *California Agriculture* **68**, 20-29 (2014).
- 507 4 Davis, M. J., Purcell, A. H. & Thomson, S. V. Pierce's disease of grapevines: isolation  
508 of the causal bacterium. *Science* **199**, 75-77 (1978).
- 509 5 Martelli, G., Boscia, D., Porcelli, F. & Saponari, M. The olive quick decline  
510 syndrome in south-east Italy: a threatening phytosanitary emergency. *European*  
511 *Journal of Plant Pathology* **144**, 235-243 (2016).
- 512 6 Hearon, S. S., Sherald, J. L. & Kostka, S. J. Association of xylem-limited bacteria  
513 with elm, sycamore, and oak leaf scorch. *Canadian Journal of Botany* **58**, 1986-  
514 1993 (1980).
- 515 7 Wells, J. M., Raju, B. & Nyland, G. Isolation, culture and pathogenicity of the  
516 bacterium causing phony disease of peach. *Phytopathology* **73**, 859-862 (1983).
- 517 8 Chang, C. J., Garnier, M., Zreik, L., Rossetti, V. & Bové, J. M. Culture and serological  
518 detection of the xylem-limited bacterium causing citrus variegated chlorosis and  
519 its identification as a strain of *Xylella fastidiosa*. *Current Microbiology* **27**, 137-142  
520 (1993).
- 521 9 Davis, M., Thomson, S. & Purcell, A. Etiological role of a xylem-limited bacterium  
522 causing Pierce's disease in almond leaf scorch. *Phytopathology* **70**, 5 (1980).
- 523 10 Almeida, R. P. & Nunney, L. How do plant diseases caused by *Xylella fastidiosa*  
524 emerge? *Plant Disease* **99**, 1457-1467 (2015).
- 525 11 Scally, M., Schuenzel, E. L., Stouthamer, R. & Nunney, L. Multilocus sequence type  
526 system for the plant pathogen *Xylella fastidiosa* and relative contributions of  
527 recombination and point mutation to clonal diversity. *Applied and Environmental*  
528 *Microbiology* **71**, 8491-8499 (2005).
- 529 12 Yuan, X. *et al.* Multilocus sequence typing of *Xylella fastidiosa* causing Pierce's  
530 disease and oleander leaf scorch in the United States. *Phytopathology* **100**, 601-  
531 611 (2010).
- 532 13 Nunney, L., Ortiz, B., Russell, S. A., Sánchez, R. R. & Stouthamer, R. The complex  
533 biogeography of the plant pathogen *Xylella fastidiosa*: genetic evidence of  
534 introductions and subspecific introgression in Central America. *PLoS One* **9**,  
535 e112463 (2014).
- 536 14 Nunney, L., Elfekih, S. & Stouthamer, R. The importance of multilocus sequence  
537 typing: cautionary tales from the bacterium *Xylella fastidiosa*. *Phytopathology*  
538 **102**, 456-460 (2012).

- 539 15 Schuenzel, E. L., Scally, M., Stouthamer, R. & Nunney, L. A multigene phylogenetic  
540 study of clonal diversity and divergence in North American strains of the plant  
541 pathogen *Xylella fastidiosa*. *Applied and Environmental Microbiology* **71**, 3832-  
542 3839 (2005).
- 543 16 Marcelletti, S. & Scortichini, M. Genome-wide comparison and taxonomic  
544 relatedness of multiple *Xylella fastidiosa* strains reveal the occurrence of three  
545 subspecies and a new *Xylella* species. *Archives of Microbiology* **198**, 803-812  
546 (2016).
- 547 17 Bull, C. *et al.* List of new names of plant pathogenic bacteria (2008-2010). *Journal*  
548 *of Plant Pathology* **94**, 21-27 (2012).
- 549 18 Wells, J. M. *et al.* *Xylella fastidiosa* gen. nov., sp. nov.: gram-negative, xylem-limited,  
550 fastidious plant bacteria related to *Xanthomonas* spp. *International Journal of*  
551 *Systematic and Evolutionary Microbiology* **37**, 136-143 (1987).
- 552 19 Nunney, L. *et al.* Population genomic analysis of a bacterial plant pathogen: novel  
553 insight into the origin of Pierce's disease of grapevine in the US. *PLoS One* **5**,  
554 e15488 (2010).
- 555 20 Nunes, L. R. *et al.* Microarray analyses of *Xylella fastidiosa* provide evidence of  
556 coordinated transcription control of laterally transferred elements. *Genome*  
557 *Research* **13**, 570-578 (2003).
- 558 21 Coletta-Filho, H. D., Francisco, C. S., Lopes, J. R., Muller, C. & Almeida, R. P.  
559 Homologous recombination and *Xylella fastidiosa* host-pathogen associations in  
560 South America. *Phytopathology* **107**, 305-312 (2017).
- 561 22 De Lima, J. *et al.* Coffee leaf scorch bacterium: axenic culture, pathogenicity, and  
562 comparison with *Xylella fastidiosa* of citrus. *Plant Disease* **82**, 94-97 (1998).
- 563 23 Nunney, L., Yuan, X., Bromley, R. E. & Stouthamer, R. Detecting genetic  
564 introgression: high levels of intersubspecific recombination found in *Xylella*  
565 *fastidiosa* in Brazil. *Applied and Environmental Microbiology* **78**, 4702-4714  
566 (2012).
- 567 24 Nunney, L., Schuenzel, E. L., Scally, M., Bromley, R. E. & Stouthamer, R. Large-scale  
568 intersubspecific recombination in the plant-pathogenic bacterium *Xylella*  
569 *fastidiosa* is associated with the host shift to mulberry. *Applied and Environmental*  
570 *Microbiology* **80**, 3025-3033 (2014).
- 571 25 Randall, J. J. *et al.* Genetic analysis of a novel *Xylella fastidiosa* subspecies found in  
572 the southwestern United States. *Applied and Environmental Microbiology* **75**,  
573 5631-5638 (2009).
- 574 26 Nunney, L. *et al.* Recent evolutionary radiation and host plant specialization in  
575 the *Xylella fastidiosa* subspecies native to the United States. *Applied and*  
576 *Environmental Microbiology* **79**, 2189-2200 (2013).
- 577 27 Denancé, N. *et al.* Several subspecies and sequence types are associated with the  
578 emergence of *Xylella fastidiosa* in natural settings in France. *Plant Pathology* **66**,  
579 1054-1064 (2017).
- 580 28 EPPO. Normes OEPP EPPO Standards - PM 7/24 (2) *Xylella fastidiosa*. *EPPO*  
581 *bulletin* **46**, 463-500 (2016).
- 582 29 Olmo, D. *et al.* First detection of *Xylella fastidiosa* on cherry (*Prunus avium*) and  
583 *Polygala myrtifolia* plants, in Mallorca Island, Spain. *Plant Disease* (2017).
- 584 30 Amanifar, N., Taghavi, M., Izadpanah, K. & Babaei, G. Isolation and pathogenicity  
585 of *Xylella fastidiosa* from grapevine and almond in Iran. *Phytopathologia*  
586 *Mediterranea* **53**, 318 (2014).

- 587 31 Çağlar, B. *et al.* First report of almond leaf scorch in Turkey. *Journal of Plant*  
588 *Pathology* **87** (2005).
- 589 32 Su, C. C. *et al.* Pierce's disease of grapevines in Taiwan: Isolation, cultivation and  
590 pathogenicity of *Xylella fastidiosa*. *European Journal of Plant Pathology* **161**, 389-  
591 396 (2013).
- 592 33 Wallingford, A. K., Myers, A. L. & Wolf, T. K. Expansion of the range of Pierce's  
593 disease in Virginia. *Online. Plant Health Progress* doi:10.1094/PHP-2007-1004-01-  
594 BR. (2007).
- 595 34 Purcell, A. Environmental therapy for Pierce's disease of grapevines. *Plant*  
596 *Disease* **64**, 388-390 (1980).
- 597 35 Feil, H. & Purcell, A. H. Temperature-dependent growth and survival of *Xylella*  
598 *fastidiosa* in vitro and in potted grapevines. *Plant Disease* **85**, 1230-1234 (2001).
- 599 36 Anas, O., Harrison, U. J., Brannen, P. M. & Sutton, T. B. Effect of warming winter  
600 temperatures on the severity of Pierce's disease in the Appalachian Mountains  
601 and Piedmont of the Southeastern United States. *Online. Plant Health Progress*  
602 doi:10.1094/PHP-2008-0718-01-RS. **1**, 450-459 (2008).
- 603 37 Lieth, J., Meyer, M., Yeo, K.-H. & Kirkpatrick, B. Modeling cold curing of Pierce's  
604 disease in *Vitis vinifera* 'Pinot Noir' and 'Cabernet sauvignon' grapevines in  
605 California. *Phytopathology* **101**, 1492-1500 (2011).
- 606 38 Keller, R. P., Lodge, D. M. & Finnoff, D. C. Risk assessment for invasive species  
607 produces net bioeconomic benefits. *Proceedings of the National Academy of*  
608 *Sciences* **104**, 203-207 (2007).
- 609 39 Bosso, L., Febraro, M., Cristinzio, G., Zoina, A. & Russo, D. Shedding light on the  
610 effects of climate change on the potential distribution of *Xylella fastidiosa*.  
611 *Biological Invasions* **18**, 1759-1768 (2016).
- 612 40 Hoddle, M. S. The potential adventive geographic range of glassy-winged  
613 sharpshooter, *Homalodisca coagulata* and the grape pathogen *Xylella fastidiosa*:  
614 implications for California and other grape growing regions of the world. *Crop*  
615 *Protection* **23**, 691-699 (2004).
- 616 41 Broennimann, O. & Guisan, A. Predicting current and future biological invasions:  
617 both native and invaded ranges matter. *Biology Letters* **4**, 585-589 (2008).
- 618 42 Kamas, J. *et al.* Pierce's disease overview and management guide: A resource for  
619 grape growers in Texas and other Eastern U.S. growing regions. (Texas A&M  
620 AgriLife Ext., College Station, Texas., 2012).
- 621 43 Smith, D., Dominiak-Olson, J. & Sharber, C. First report of Pierce's disease of grape  
622 caused by *Xylella fastidiosa* in Oklahoma. *Plant Disease* **93**, 762-762 (2009).
- 623 44 Fick, S. E. & Hijmans, R. J. WorldClim 2: new 1 - km spatial resolution climate  
624 surfaces for global land areas. *International Journal of Climatology* **37**, 4302-4315  
625 (2017).
- 626 45 Watanabe, M. *et al.* Improved climate simulation by MIROC5: mean states,  
627 variability, and climate sensitivity. *Journal of Climate* **23**, 6312-6335 (2010).
- 628 46 Flato, G. *et al.* in *Climate Change 2013: The Physical Science Basis. Contribution of*  
629 *Working Group I to the Fifth Assessment Report of the Intergovernmental Panel on*  
630 *Climate Change* (eds T.F. Stocker *et al.*) 741-866 (Cambridge University press,  
631 2013).
- 632 47 Van Vuuren, D. P. *et al.* The representative concentration pathways: an overview.  
633 *Climatic Change* **109**, 5-31 (2011).
- 634 48 Agresti, A. *Categorical Data Analysis*. Second edn, (Wiley, 2002).

- 635 49 R Core Team. R: A language and environment for statistical computing. R  
636 Foundation for Statistical Computing, Vienna, Austria. URL [https://www.R-](https://www.R-project.org/)  
637 [project.org/](https://www.R-project.org/). (2017).
- 638 50 Venables, W. N. & Ripley, B. D. *Modern Applied Statistics with S.*, (Springer, 2002).
- 639 51 Christensen, R. H. B. ordinal - Regression Models for Ordinal Data. R package  
640 version 2015.6-28. <http://www.cran.r-project.org/package=ordinal/>. (2015).
- 641 52 Franklin, J. *Mapping species distributions: spatial inference and prediction.*  
642 (Cambridge University Press, 2010).
- 643 53 Busby, J. R. BIOCLIM: a bioclimate analysis and prediction system. *Plant Prot Q* **6**,  
644 8-9 (1991).
- 645 54 Booth, T. H., Nix, H. A., Busby, J. R. & Hutchinson, M. F. BIOCLIM: the first species  
646 distribution modelling package, its early applications and relevance to most  
647 current MAXENT studies. *Biodiversity and Conservation* **20**, 1-9 (2014).
- 648 55 Carpenter, G., Gillison, A. & Winter, J. DOMAIN: a flexible modelling procedure for  
649 mapping potential distributions of plants and animals. *Biodiversity and*  
650 *Conservation* **2**, 667-680 (1993).
- 651 56 Lobo, J. M. The use of occurrence data to predict the effects of climate change on  
652 insects. *Current Opinion in Insect Science* **17**, 62-68 (2016).
- 653 57 Phillips, S. J., Anderson, R. P. & Schapire, R. E. Maximum entropy modeling of  
654 species geographic distributions. *Ecological modelling* **190**, 231--259 (2006).
- 655 58 Pearson, R. G., Raxworthy, C. J., Nakamura, M. & Townsend Peterson, A. Predicting  
656 species distributions from small numbers of occurrence records: a test case using  
657 cryptic geckos in Madagascar. *Journal of Biogeography* **34**, 102-117,  
658 doi:10.1111/j.1365-2699.2006.01594.x (2007).
- 659 59 Hijmans, R. J., Phillips, S., Leathwick, J. & Elith, J. dismo: Species Distribution  
660 Modeling. R package version 1.1-4. <https://CRAN.R-project.org/package=dismo>.  
661 (2017).
- 662 60 Jiménez-Valverde, A. *et al.* Use of niche models in invasive species risk  
663 assessments. *Biological Invasions* **13**, 2785-2797 (2011).
- 664 61 Daugherty, M. P., Zeilinger, A. R. & Almeida, R. P. P. Conflicting Effects of Climate  
665 and Vector Behavior on the Spread of a Plant Pathogen. *Phytobiomes* **1**, 46-53  
666 (2017).
- 667 62 Araújo, M. B. & New, M. Ensemble forecasting of species distributions. *Trends in*  
668 *Ecology & Evolution* **22**, 42-47 (2007).
- 669 63 Marmion, M., Parviainen, M., Luoto, M., Heikkinen, R. K. & Thuiller, W. Evaluation  
670 of consensus methods in predictive species distribution modelling. *Diversity and*  
671 *Distributions* **15**, 59-69 (2009).
- 672 64 Elith, J., Kearney, M. & Phillips, S. The art of modelling range-shifting species.  
673 *Methods in Ecology and Evolution* **1**, 330-342 (2010).
- 674 65 Purcell, A. Cold therapy of Pierce's disease of grapevines [Viral diseases, insect  
675 vectors]. *Plant Disease Reporter* (1977).
- 676 66 Wickham, H. *ggplot2: Elegant Graphics for Data Analysis.* (Springer-Verlag, 2016).
- 677 67 Wilke, C. O. cowplot: Streamlined Plot Theme and Plot Annotations for 'ggplot2'.  
678 R package version 0.7.0. <https://CRAN.R-project.org/package=cowplot>. (2016).
- 679 68 Yaseen, T. *et al.* On-site detection of *Xylella fastidiosa* in host plants and in “spy  
680 insects” using the real-time loop-mediated isothermal amplification method.  
681 *Phytopathologia Mediterranea* **54**, 488-496 (2015).

- 682 69 Cruaud, A. *et al.* Using insects to detect, monitor and predict the distribution of  
683 *Xylella fastidiosa*: a case study in Corsica. *bioRxiv*,  
684 doi:<http://dx.doi.org/10.1101/241513> (2018).
- 685 70 Cornara, D. *et al.* Transmission of *Xylella fastidiosa* by naturally infected *Philaenus*  
686 *spumarius* (Hemiptera, Aphrophoridae) to different host plants. *Journal of Applied*  
687 *Entomology* **141**, 80-87 (2016).
- 688 71 Saponari, M. *et al.* Infectivity and transmission of *Xylella fastidiosa* by *Philaenus*  
689 *spumarius* (Hemiptera: Aphrophoridae) in Apulia, Italy. *Journal of Economic*  
690 *Entomology* **107**, 1316-1319 (2014).
- 691 72 Goodwin, P. & Zhang, S. Distribution of *Xylella fastidiosa* in southern Ontario as  
692 determined by the polymerase chain reaction. *Canadian Journal of Plant*  
693 *Pathology* **19**, 13-18 (1997).
- 694 73 Milling, A., Meng, F., Denny, T. P. & Allen, C. Interactions with hosts at cool  
695 temperatures, not cold tolerance, explain the unique epidemiology of *Ralstonia*  
696 *solanacearum* race 3 biovar 2. *Phytopathology* **99**, 1127-1134 (2009).
- 697 74 Soberón, J. & Peterson, A. T. Interpretation of models of fundamental ecological  
698 niches and species' distributional areas. *Biodiversity Informatics* **2**, 1-10 (2005).
- 699 75 Chauvel, G., Cruaud, A., Legendre, B., Germain, J.-F. & Rasplus, J.-Y. Rapport de  
700 mission d'expertise sur *Xylella fastidiosa* en Corse., (French Ministry of  
701 agriculture and food, Available at:  
702 [http://agriculture.gouv.fr/sites/minagri/files/20150908\\_rapport\\_mission\\_corse\\_xylella\\_31082015b.pdf](http://agriculture.gouv.fr/sites/minagri/files/20150908_rapport_mission_corse_xylella_31082015b.pdf), 2015).
- 703  
704 76 Rasplus, J.-Y. *et al.* in *AFPP - 4e conférence sur l'entretien des jardins végétalisés et*  
705 *infrastructures.* (Available from  
706 [http://arbestense.it/images/Annales\\_IJEVI\\_2016.compressed.pdf](http://arbestense.it/images/Annales_IJEVI_2016.compressed.pdf)).
- 707

## 708 Acknowledgements

709  
710 We thank Pauline De Jerphanion (ANSES) manager of the French national database of  
711 *Xylella fastidiosa* in France as well as the DGAL and the SRAL or feeding that database.  
712 We also thank Christian Lannou (INRA, SPE, France) for his interest and support during  
713 the course of the project. This work was funded by grants from the SPE department of  
714 the INRA (National Agronomic Institute). The funders had no role in study design, data  
715 collection and analysis, decision to publish, or preparation of the manuscript. JPR thanks  
716 the SNCF (French national railway company) whose recurrent delays allowed him to  
717 deeply meditate on the results reported in here.

## 719 Figure and table captions

720  
721 **Figure 1** (A) Pierce's disease (PD) severity map in the United States. Each locality is  
722 associated to a PD severity index (low, moderate or high severity) on the basis of the  
723 map available in Anas *et al.*<sup>36</sup> and Kamas *et al.*<sup>42</sup>. (B) Occurrence records for the ST6 and  
724 ST7 strains in France. Occurrence records for (C) *Xylella fastidiosa* subsp. *pauca* and (D)  
725 *Xylella fastidiosa* subsp. *multiplex* in the Americas.

726  
727 **Figure 2** Predicted potential severity of Pierce's disease in Europe under current and  
728 future climate conditions obtained from a cumulative link model (CLM). 1 = low severity,  
729 2 = moderate severity, 3 = high severity. Current climate conditions are average  
730 temperature for the period 1970-2000 extracted from the Worldclim database<sup>44</sup>. Future

731 climate estimates were obtained from the MIROC5 global climate model (scenarios 4.5  
732 and 8.5). A: Predicted PD severity index for the period 1970-2000. B: Predicted PD  
733 severity index in 2050 with the scenarios RCP4.5. C: Predicted PD severity index in 2050  
734 with the scenarios RCP8.5. Areas associated to climate conditions that are not met  
735 within the range of conditions characterizing the set of reference points in the native  
736 range (i.e. MESS index < 0 see material and methods) are shown in grey.

737

738 **Figure 3** Predicted potential distribution of *Xf* subsp. *pauca* in Europe under current and  
739 future climate conditions obtained by fitting Bioclim and Domain models. Current  
740 climate conditions are average temperatures for the period 1970-2000 extracted from  
741 the Worldclim database. Future climate estimates were obtained from the MIROC5  
742 global climate model (scenarios 4.5 and 8.5). A: Habitat suitability for the period 1970-  
743 2000. B: Habitat suitability in 2050 for the scenario RCP4.5. C: Habitat suitability in 2050  
744 for the scenario RCP8.5. D: Proportion of models predicting presence for the period  
745 1970-2000. E: Proportion of models predicting presence in 2050 for the scenario  
746 RCP4.5. F: Proportion of models predicting presence in 2050 for the scenario RCP8.5.  
747 Maps A, B, C were obtained by averaging (ensemble forecasting) of the outputs of the  
748 models Bioclim and Domain run with 3 different climate datasets (see details in Table  
749 1). Maps D, E, F were obtained by averaging the presence/absence maps derived from  
750 habitat suitability using the lowest presence threshold. Areas associated to climate  
751 conditions that are not met within the range of conditions characterizing the set of  
752 reference points in the native range (i.e. MESS index < 0 see material and methods) are  
753 shown in grey.

754

755 **Figure 4** Predicted potential distribution of *Xf* subsp. *multiplex* in Europe under current  
756 and future climate conditions obtained by fitting Bioclim and Domain models. Current  
757 climate conditions are average temperatures for the period 1970-2000 extracted from  
758 the Worldclim database. Future climate estimates were obtained from the MIROC5  
759 global climate model (scenarios 4.5 and 8.5). A: Habitat suitability for the period 1970-  
760 2000. B: Habitat suitability in 2050 for the scenario RCP4.5. C: Habitat suitability in 2050  
761 for the scenario RCP8.5. D: Proportion of models predicting presence for the period  
762 1970-2000. E: Proportion of models predicting presence in 2050 for the scenario  
763 RCP4.5. F: Proportion of models predicting presence in 2050 for the scenario RCP8.5.  
764 Maps A, B, C were obtained by averaging (ensemble forecasting) of the outputs of the  
765 models Bioclim and Domain run with 3 different climate datasets (see details in Table  
766 1). Maps D, E, F were obtained by averaging the presence/absence maps derived from  
767 habitat suitability using the lowest presence threshold. Areas associated to climate  
768 conditions that are not met within the range of conditions characterizing the set of  
769 reference points in the native range (i.e. MESS index < 0 see material and methods) are  
770 shown in grey.

771

772

773 **Figure 5** Predicted potential distribution of the French strains ST6 and ST7 (*Xf* subsp.  
774 *multiplex*) in Europe under current and future climate conditions obtained by fitting  
775 Bioclim and Domain models. Current climate conditions are average temperatures for  
776 the period 1970-2000 extracted from the Worldclim database. Future climate estimates  
777 were obtained from the MIROC5 global climate model (scenarios 4.5 and 8.5). A: Habitat  
778 suitability for the period 1970-2000. B: Habitat suitability in 2050 for the scenario  
779 RCP4.5. C: Habitat suitability in 2050 for the scenario RCP8.5. D: Proportion of models



780 predicting presence for the period 1970-2000. E: Proportion of models predicting  
 781 presence in 2050 for the scenario RCP4.5. F: Proportion of models predicting presence  
 782 in 2050 for the scenario RCP8.5. Maps A, B, C were obtained by averaging (ensemble  
 783 forecasting) of the outputs of the models Bioclim and Domain run with 3 different  
 784 climate datasets (see details in Table 1). Maps D, E, F were obtained by averaging the  
 785 presence/absence maps derived from habitat suitability using the lowest presence  
 786 threshold. Areas associated to climate conditions that are not met within the range of  
 787 conditions characterizing the set of reference points in the native range (i.e. MESS index  
 788 < 0 see material and methods) are shown in grey.

789  
 790

791 **Table 1.** Measures of Bioclim and Domain models transferability calculated for different  
 792 climate datasets. The area under the curve of the receiver operator curve (AUC) and the  
 793 sensitivity of each model were calculated on the basis of occurrence records available in  
 794 the European invaded range for *Xf* subsp. *pauca* and *multiplex*. The climate datasets  
 795 leading to the best performing models were #1, #4 and #7 for subsp. *pauca* and #2, #6  
 796 and # 9 for subsp. *multiplex*. bio5: maximum temperature of the warmest month; bio6:  
 797 minimum temperature of the coldest month; bio10: mean temperature of the warmest  
 798 quarter; bio11: mean temperature of the coldest quarter.

799  
 800  
 801

**Table 1.**

| Dataset           | Climate variables        | Subspecies <i>pauca</i> |       |        |       | Subspecies <i>multiplex</i> |       |        |       |
|-------------------|--------------------------|-------------------------|-------|--------|-------|-----------------------------|-------|--------|-------|
|                   |                          | BIOCLIM                 |       | DOMAIN |       | BIOCLIM                     |       | DOMAIN |       |
|                   |                          | AUC                     | Sens. | AUC    | Sens. | AUC                         | Sens. | AUC    | Sens. |
| <b>dataset #1</b> | <b>bio6</b>              | 0.88                    | 1     | 0.9    | 1     | 0.686                       | 0.999 | 0.759  | 0.999 |
| dataset #2        | bio11                    | 0.44                    | 0.04  | 0.78   | 0.04  | 0.918                       | 0.999 | 0.924  | 0.999 |
| dataset #3        | bio6, bio11              | 0.45                    | 0.04  | 0.79   | 0.12  | 0.742                       | 0.999 | 0.847  | 0.999 |
| <b>dataset #4</b> | <b>bio5, bio6</b>        | 0.96                    | 1     | 0.96   | 1     | 0.839                       | 0.999 | 0.797  | 0.999 |
| dataset #5        | bio5, bio11              | 0.5                     | 0.04  | 0.92   | 0.16  | 0.838                       | 0.999 | 0.801  | 0.999 |
| dataset #6        | bio10, bio11             | 0.5                     | 0.04  | 0.91   | 0.16  | 0.884                       | 0.999 | 0.965  | 0.999 |
| <b>dataset #7</b> | <b>bio6, bio10</b>       | 0.95                    | 1     | 0.95   | 1     | 0.867                       | 0.999 | 0.904  | 0.999 |
| dataset #8        | bio5, bio6, bio11        | 0.5                     | 0.04  | 0.92   | 0.16  | 0.843                       | 0.999 | 0.803  | 0.999 |
| dataset #9        | bio6, bio10, bio11       | 0.5                     | 0.04  | 0.91   | 0.16  | 0.871                       | 0.999 | 0.933  | 0.999 |
| dataset #10       | bio5, bio6, bio10, bio11 | 0.5                     | 0.04  | 0.92   | 0.16  | 0.853                       | 0.999 | 0.819  | 0.999 |

802  
 803  
 804  
 805

**Supplementary Information accompanies this paper and are available as a pdf file**  
 (Godefroid\_etal\_Xylella\_fastidiosa\_Europe\_suppl\_mat.pdf)

**A**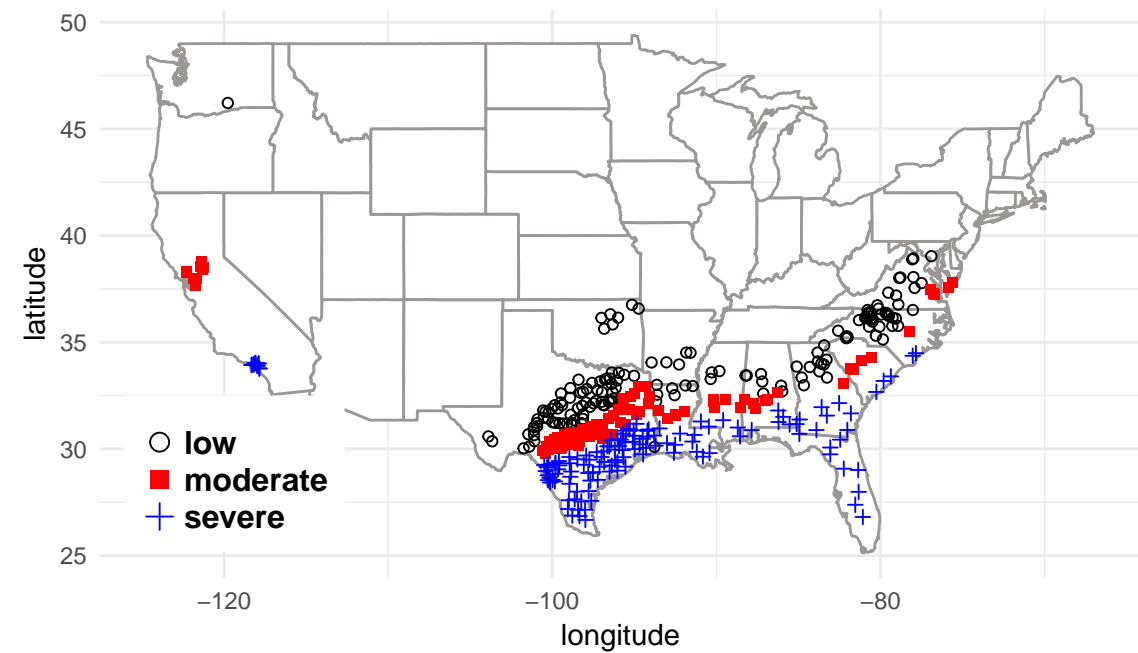**B**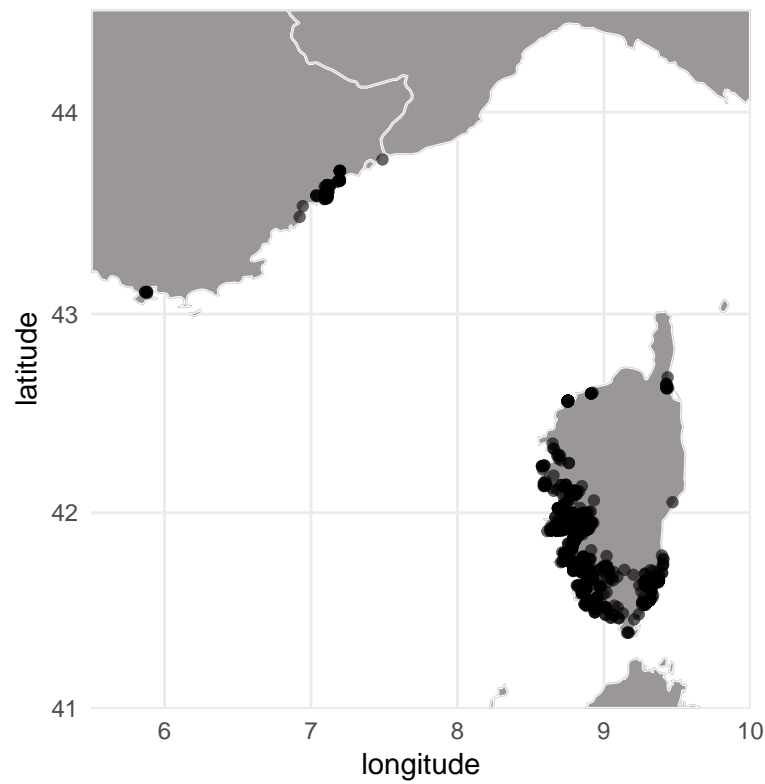**C**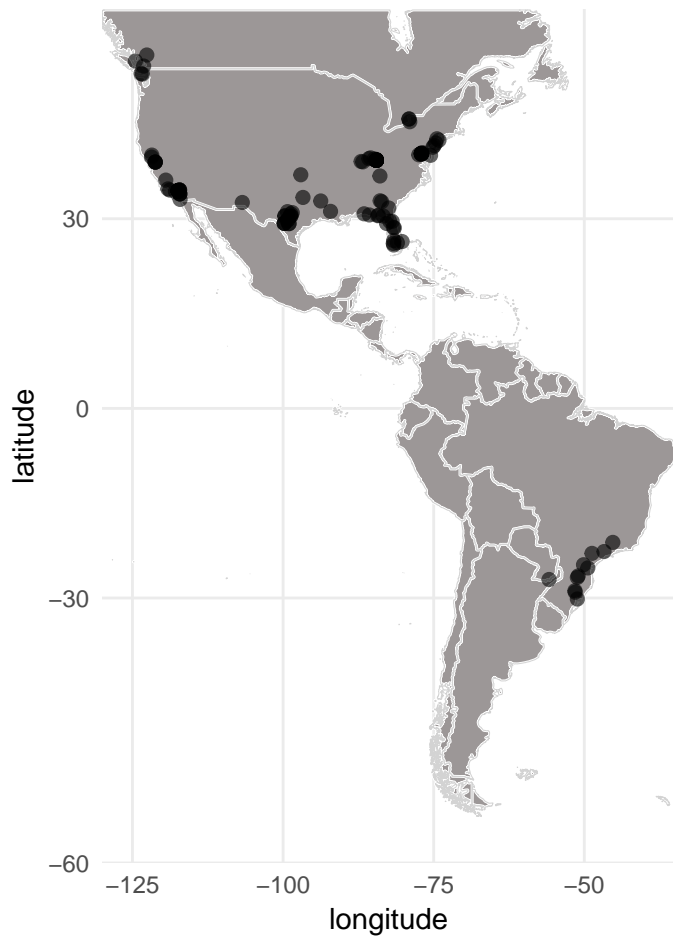**D**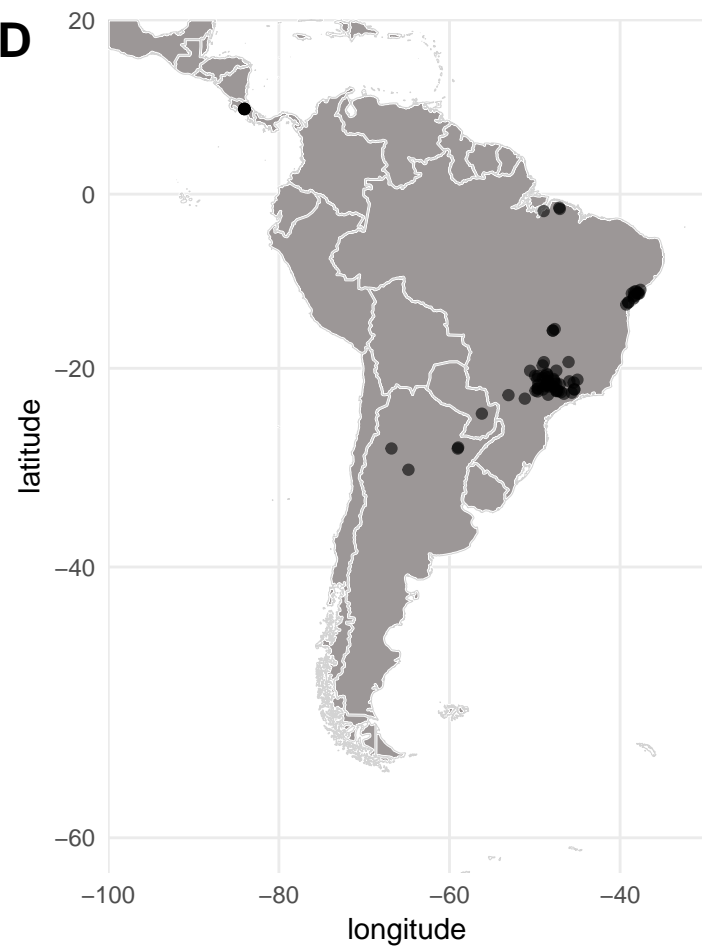

**A**

## Pierce disease severity index 1970–2000

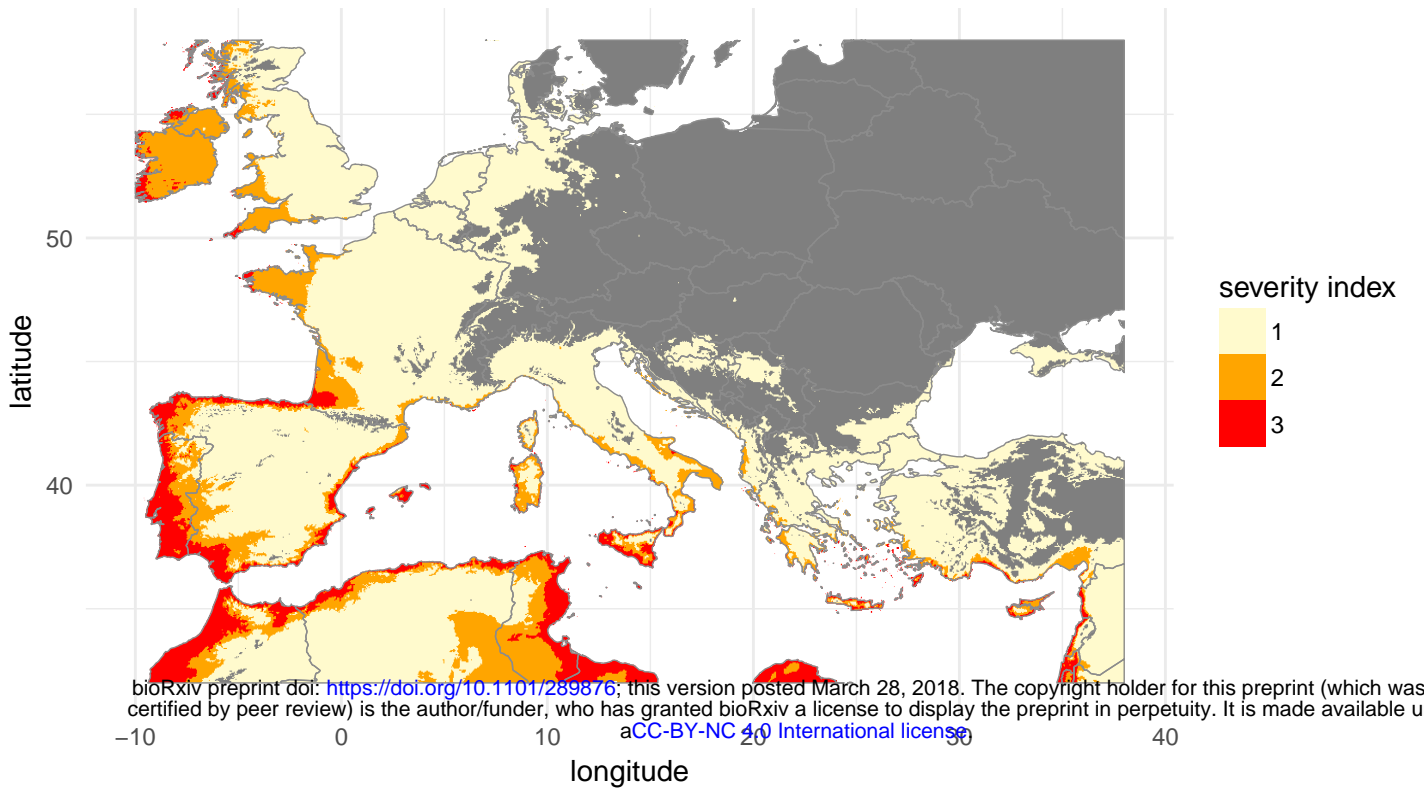**B**

## Pierce disease severity index 2050 [scenario 4.5]

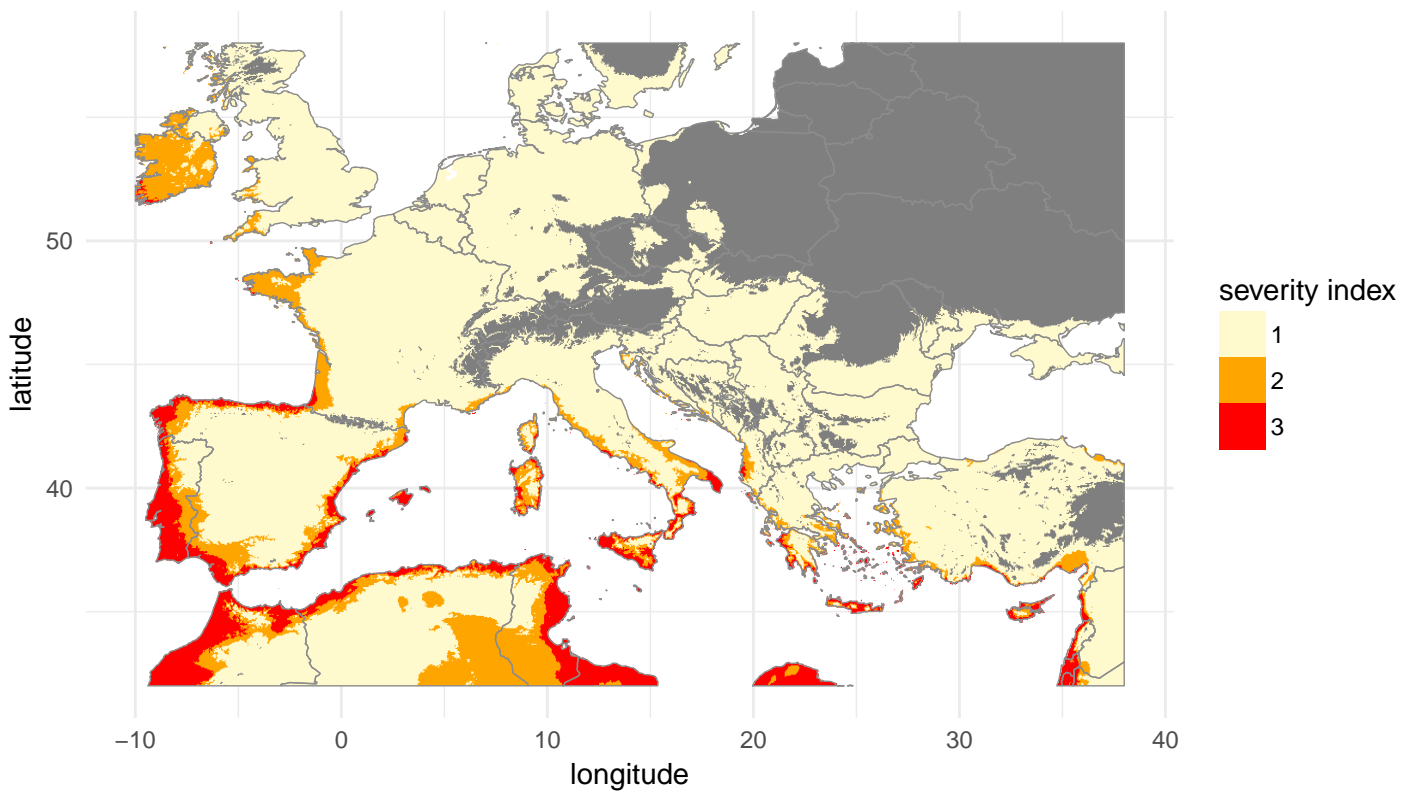**C**

## Pierce disease severity index 2050 [scenario 8.5]

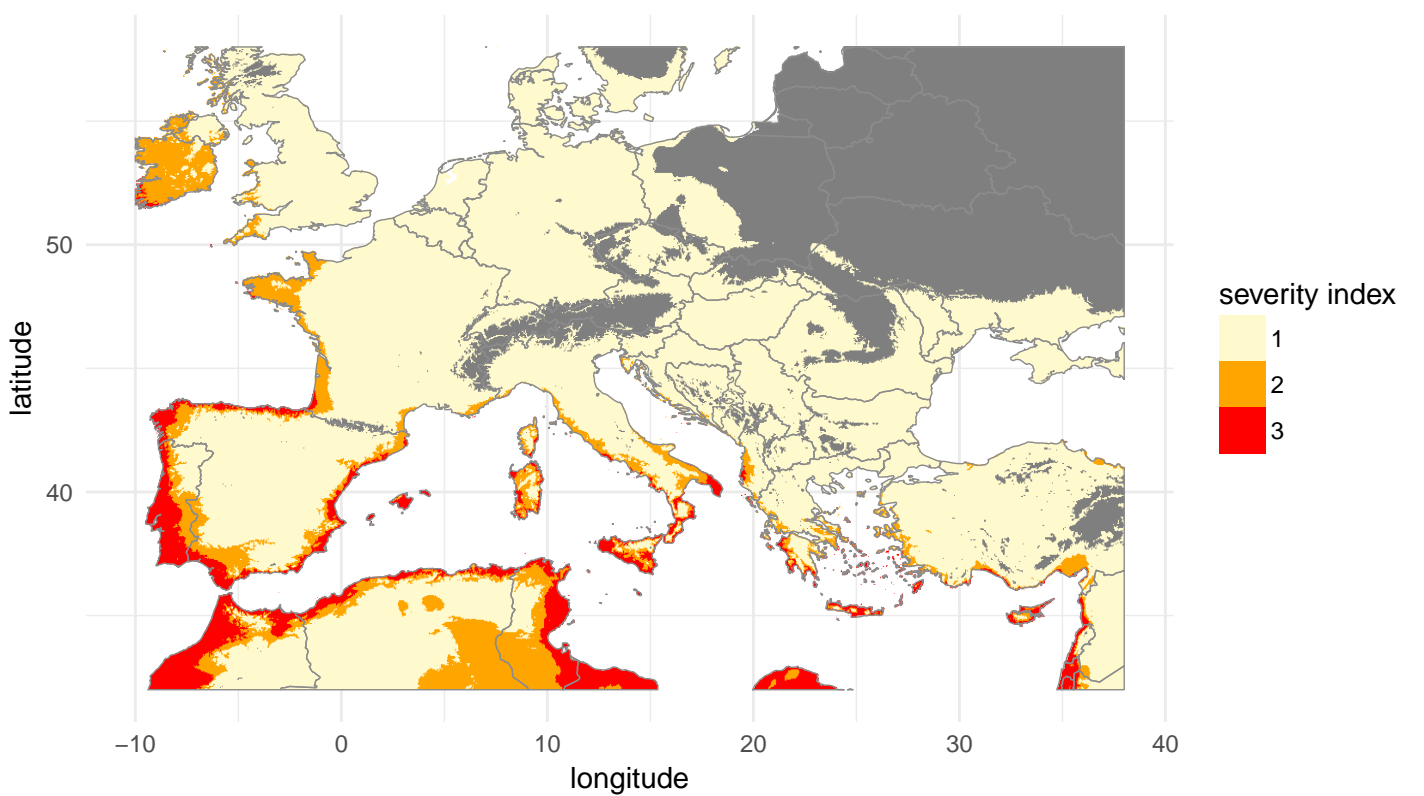

**A**

Habitat suitability 1970–2000

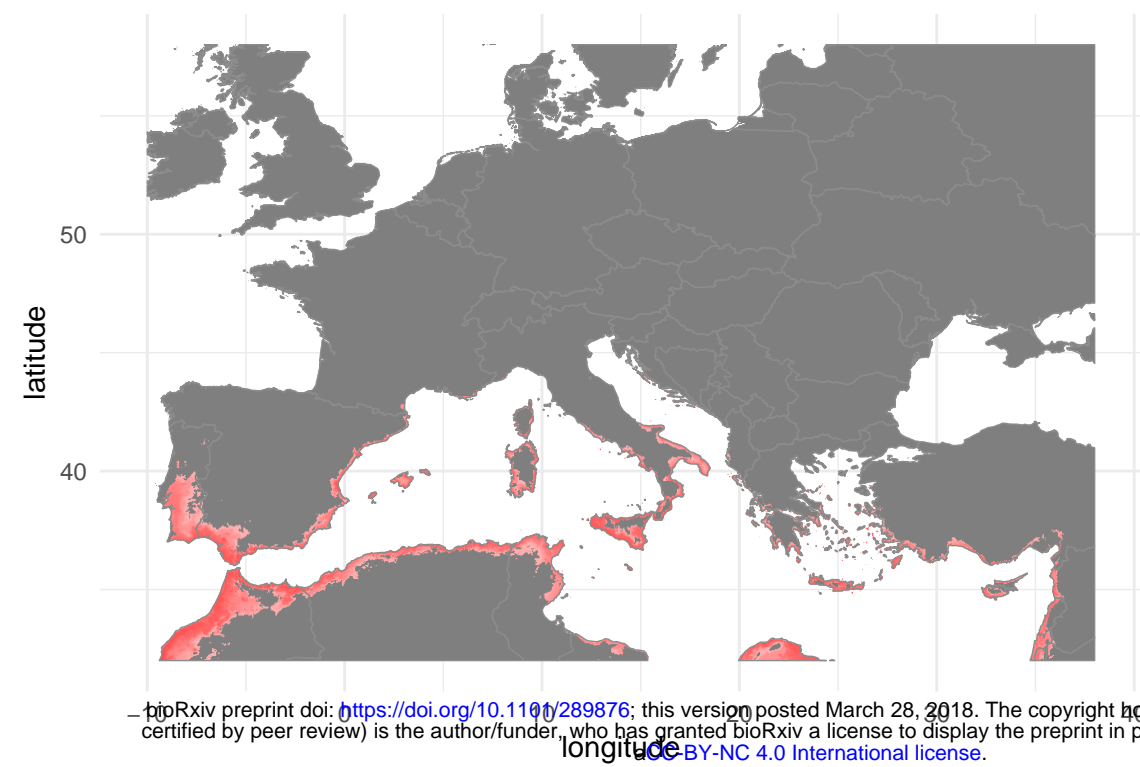**D**

Proportion of models predicting presence 1970–2000

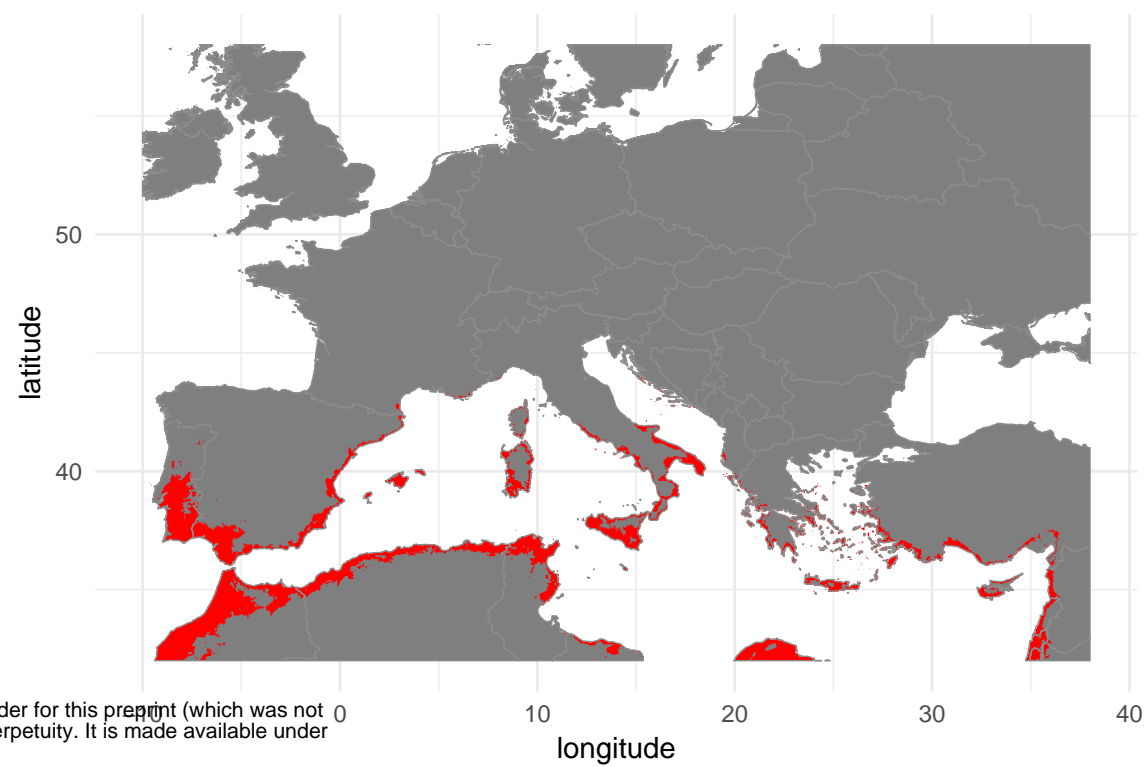

bioRxiv preprint doi: <https://doi.org/10.1101/289876>; this version posted March 28, 2018. The copyright holder for this preprint (which was not certified by peer review) is the author/funder, who has granted bioRxiv a license to display the preprint in perpetuity. It is made available under aCC-BY-NC 4.0 International license.

**B**

Habitat suitability 2050 [scenario 4.5]

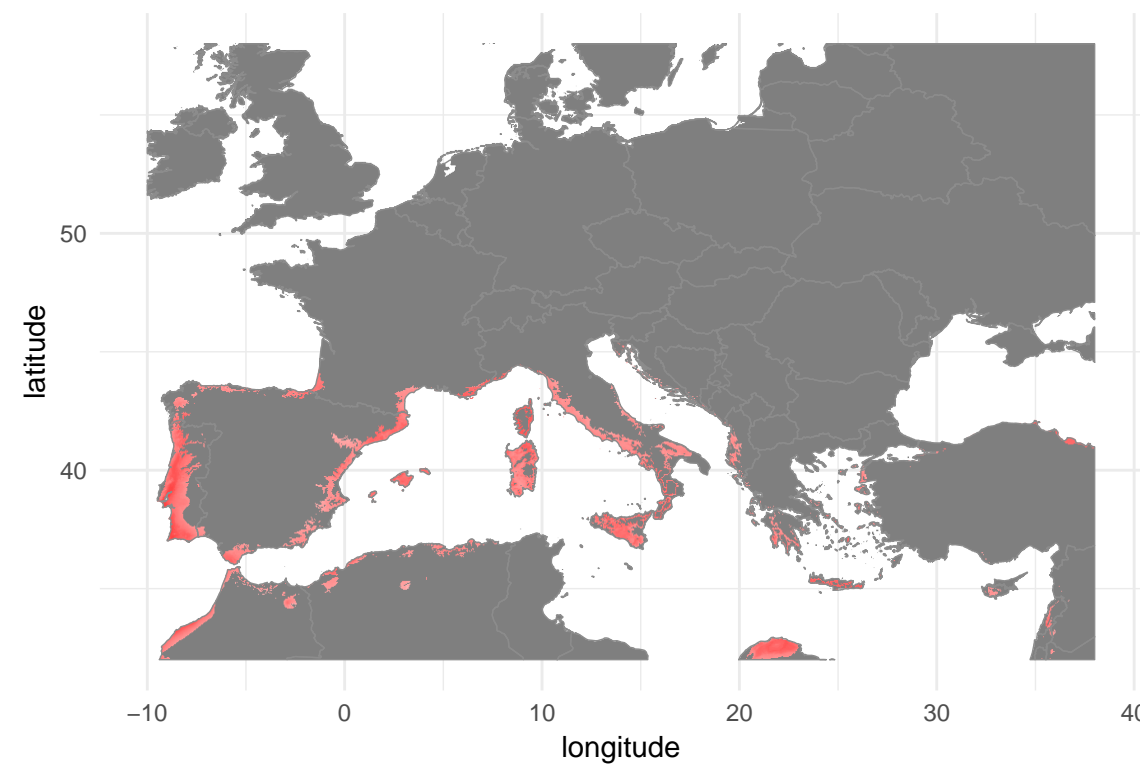**E**

Proportion of models predicting presence 2050 [scenario 4.5]

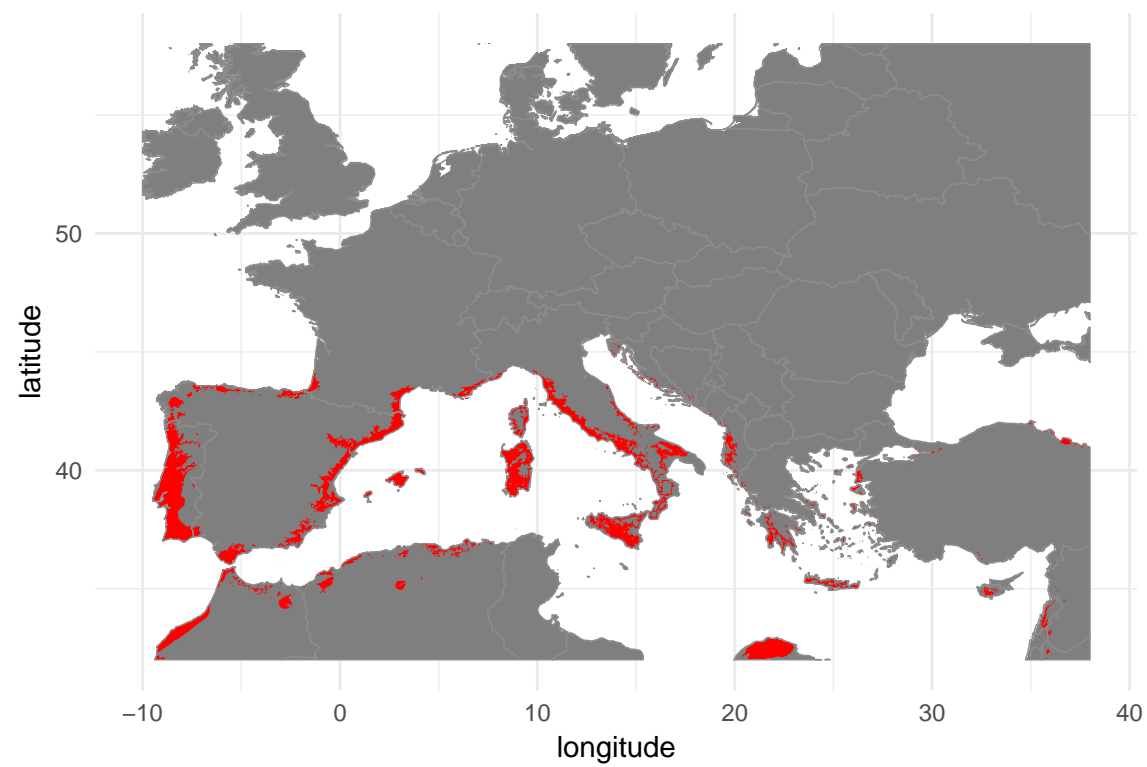**C**

Habitat suitability 2050 [scenario 8.5]

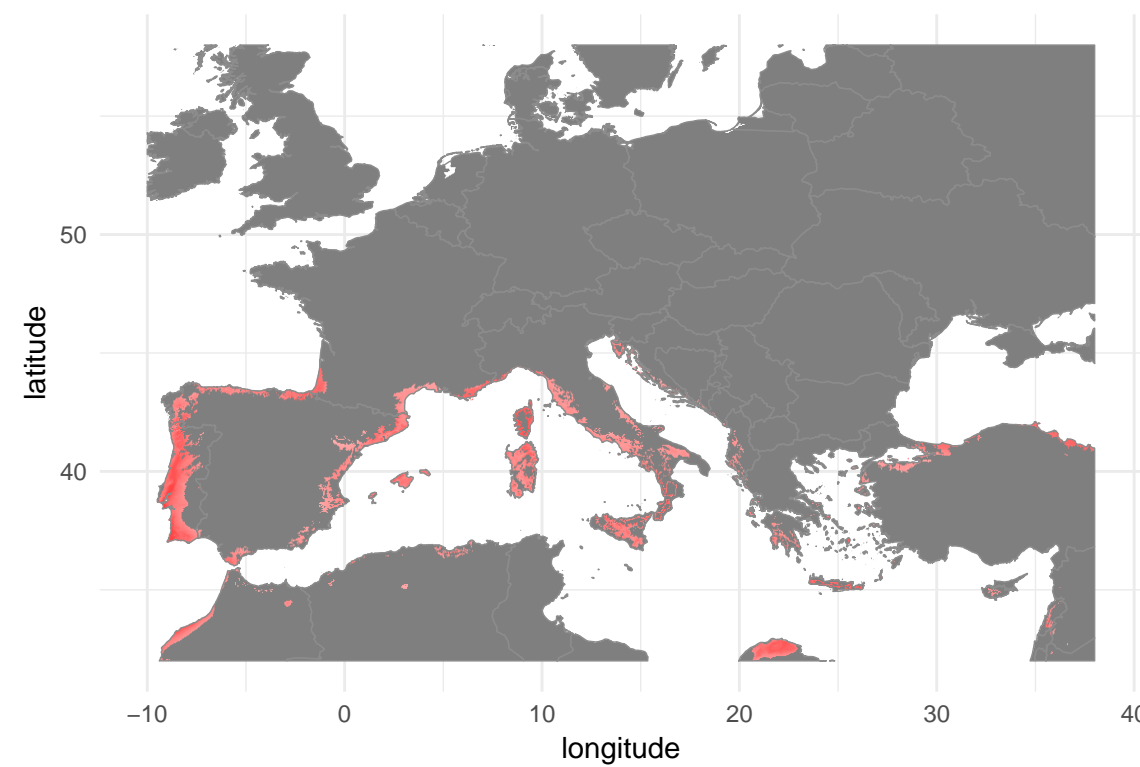**F**

Proportion of models predicting presence 2050 [scenario 8.5]

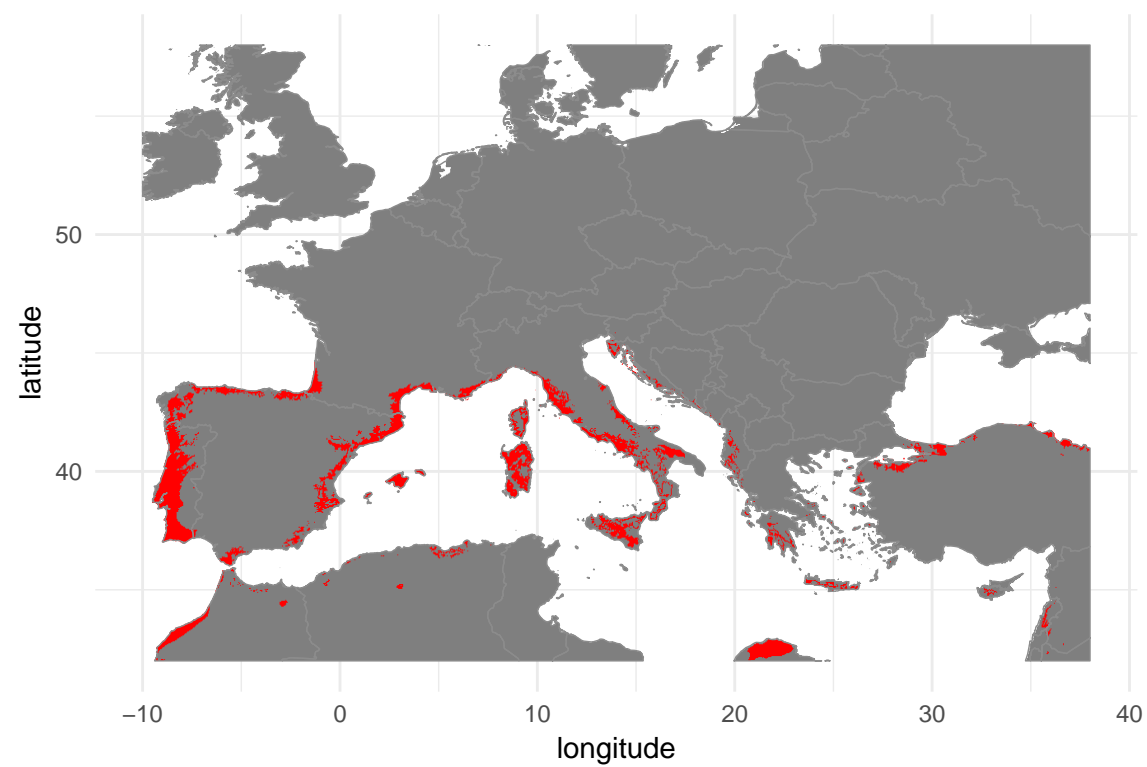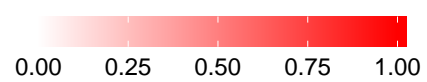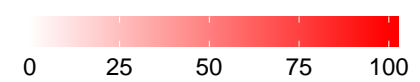

**A**

Habitat suitability 1970–2000

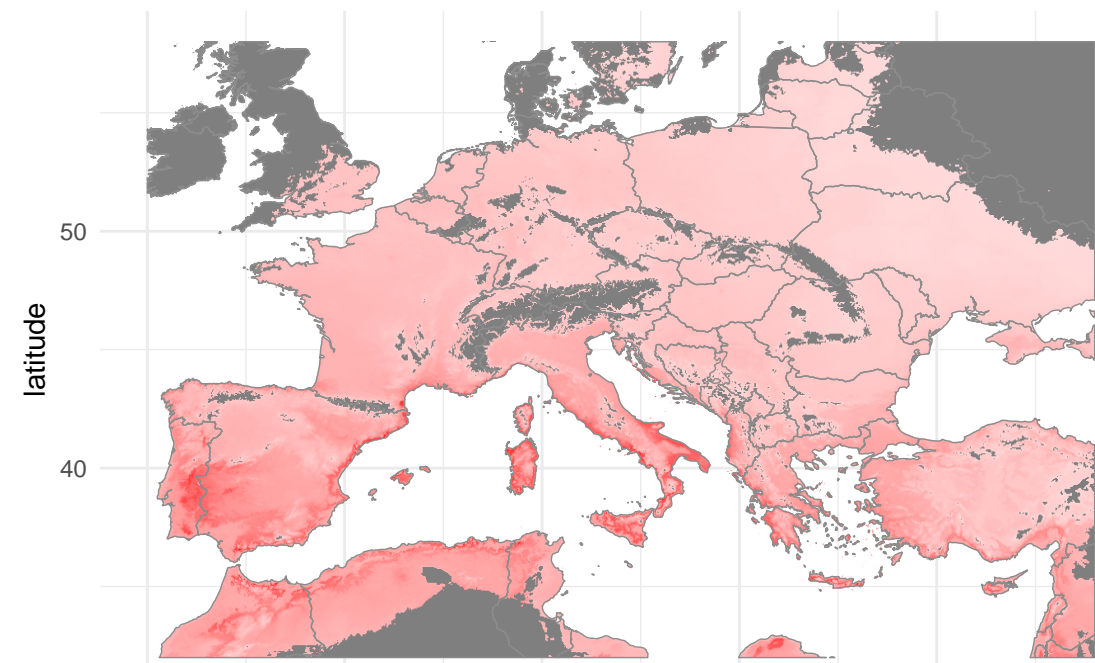**D**

Proportion of models predicting presence 1970–2000

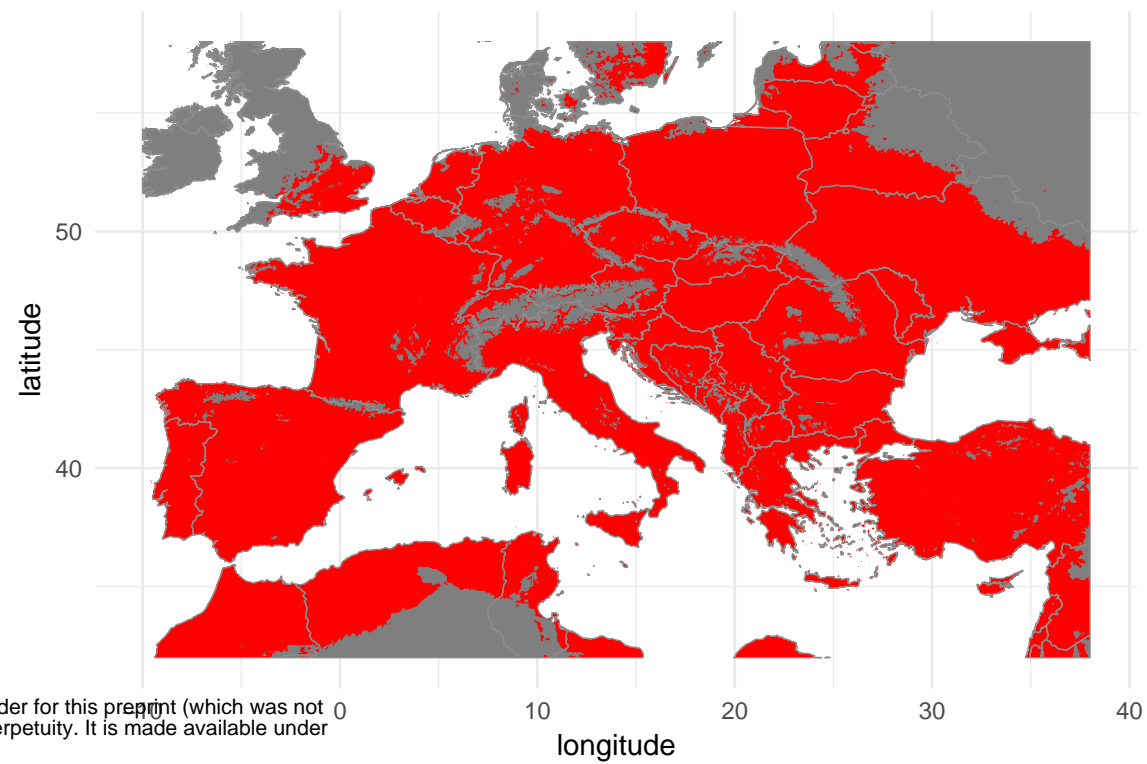

bioRxiv preprint doi: <https://doi.org/10.1101/289876>; this version posted March 28, 2018. The copyright holder for this preprint (which was not certified by peer review) is the author/funder, who has granted bioRxiv a license to display the preprint in perpetuity. It is made available under aCC-BY-NC 4.0 International license.

**B**

Habitat suitability 2050 [scenario 4.5]

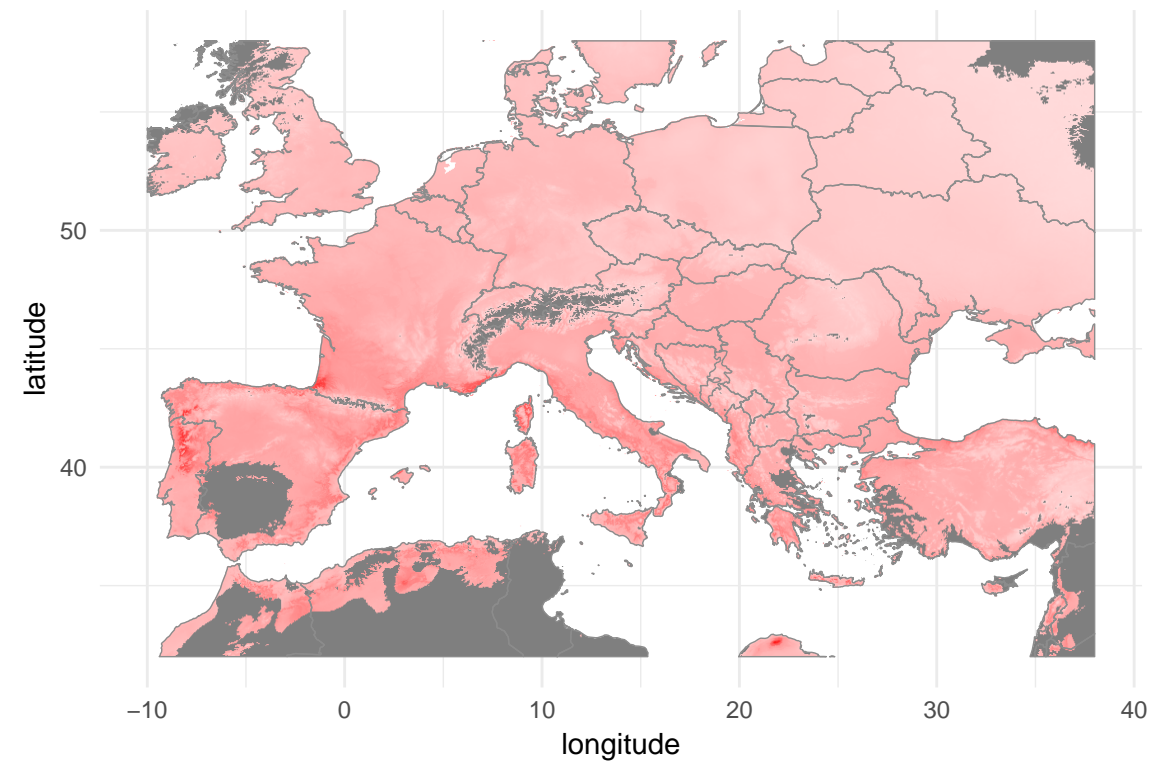**E**

Proportion of models predicting presence 2050 [scenario 4.5]

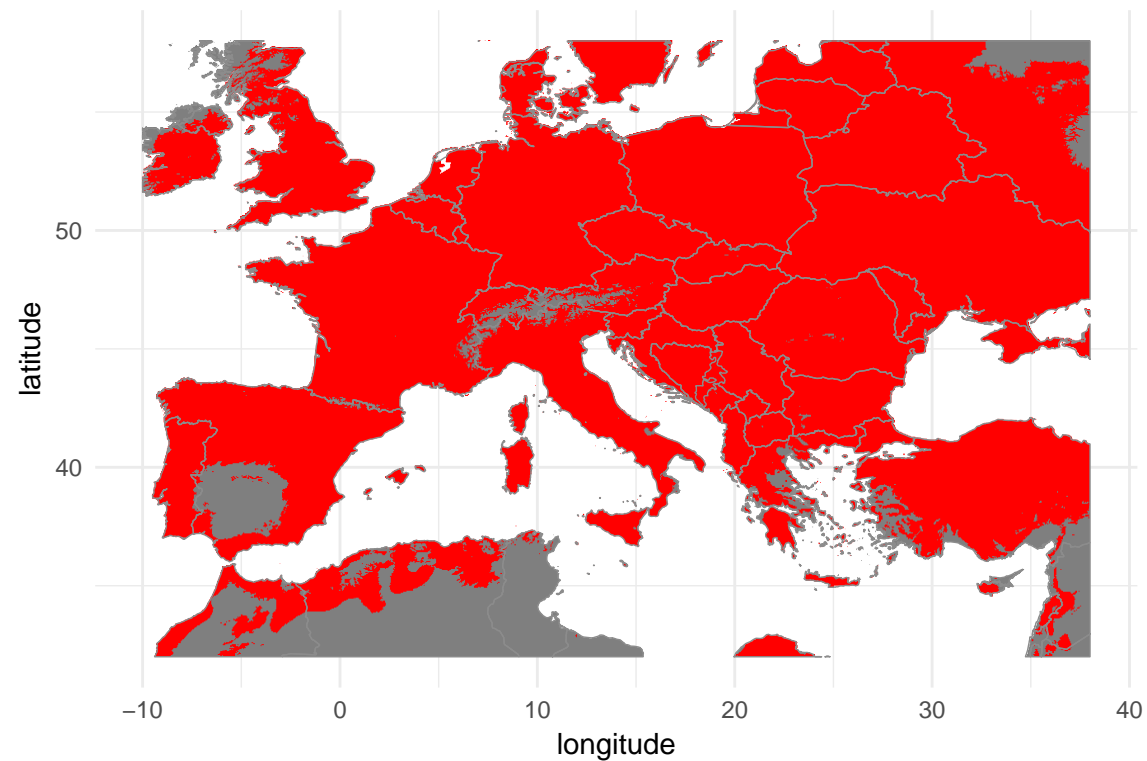**C**

Habitat suitability 2050 [scenario 8.5]

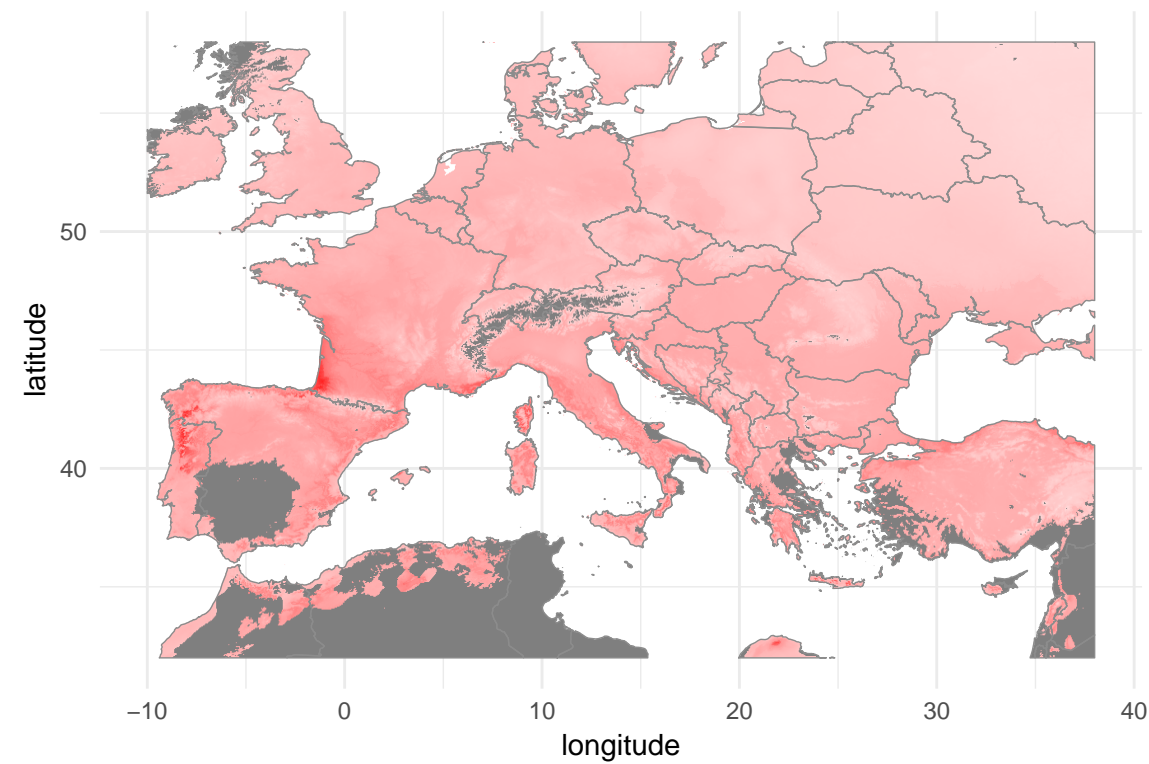**F**

Proportion of models predicting presence 2050 [scenario 8.5]

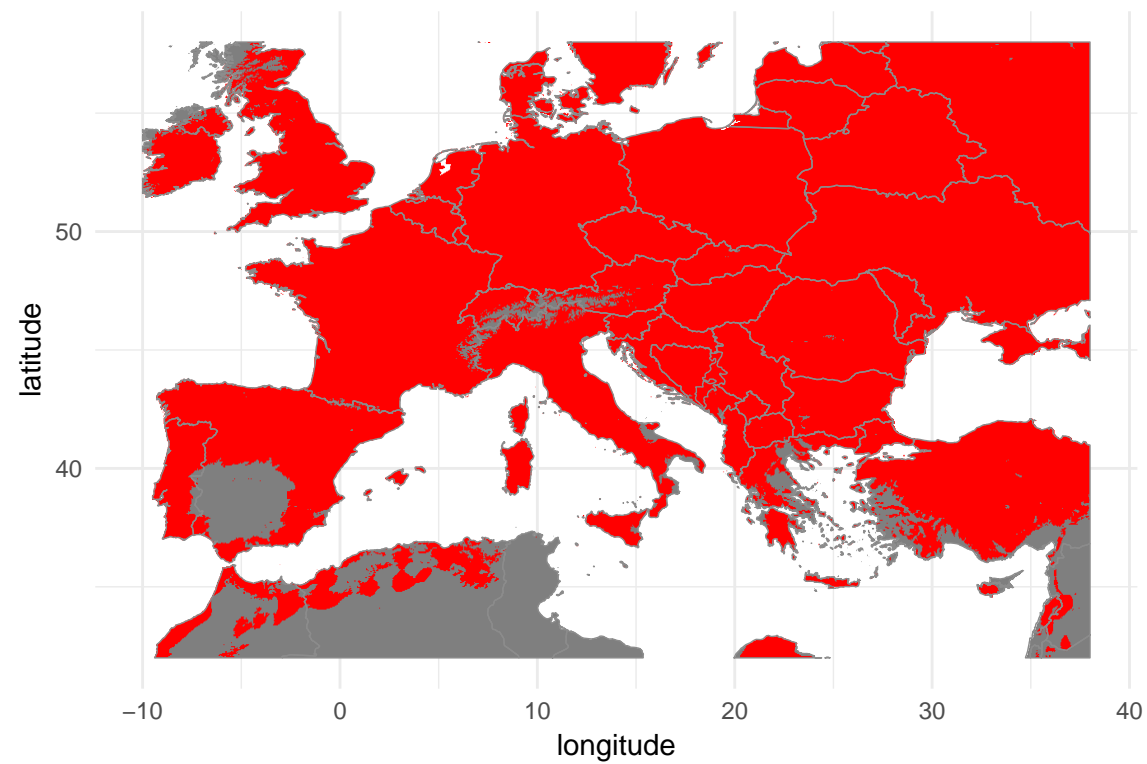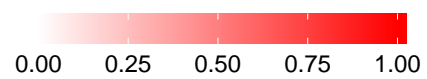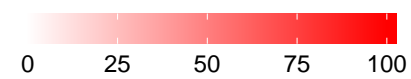

**A**

Habitat suitability 1970–2000

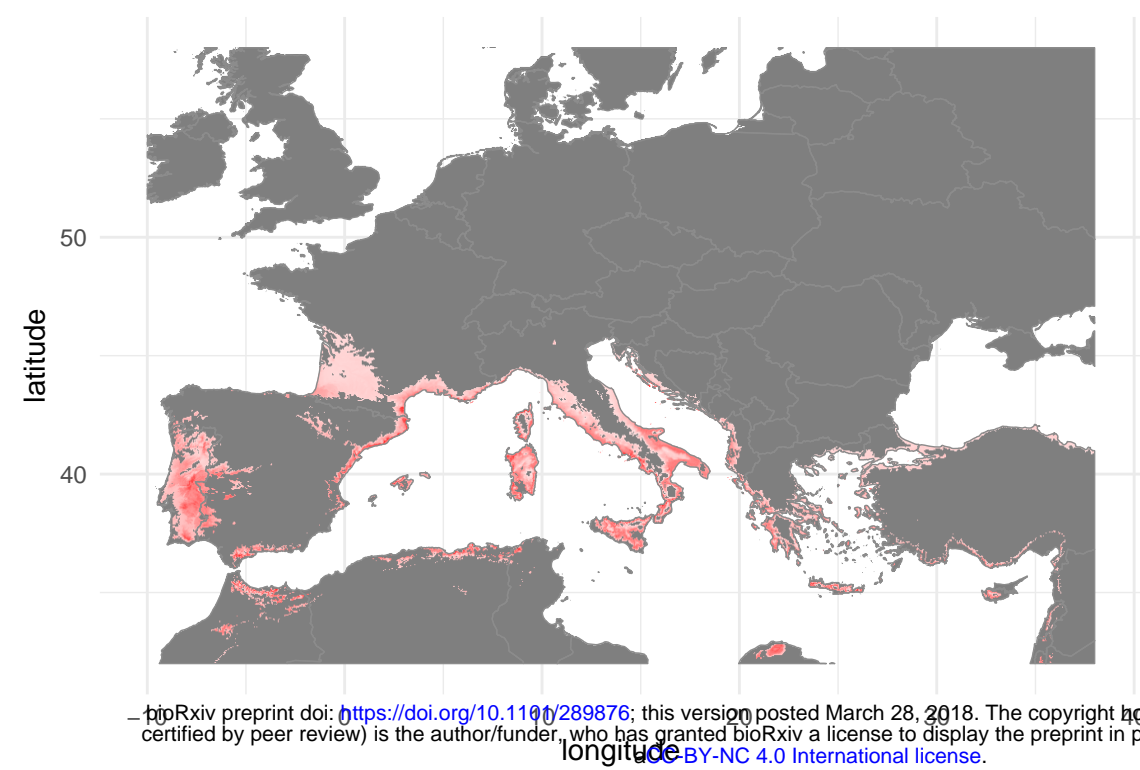**D**

Proportion of models predicting presence 1970–2000

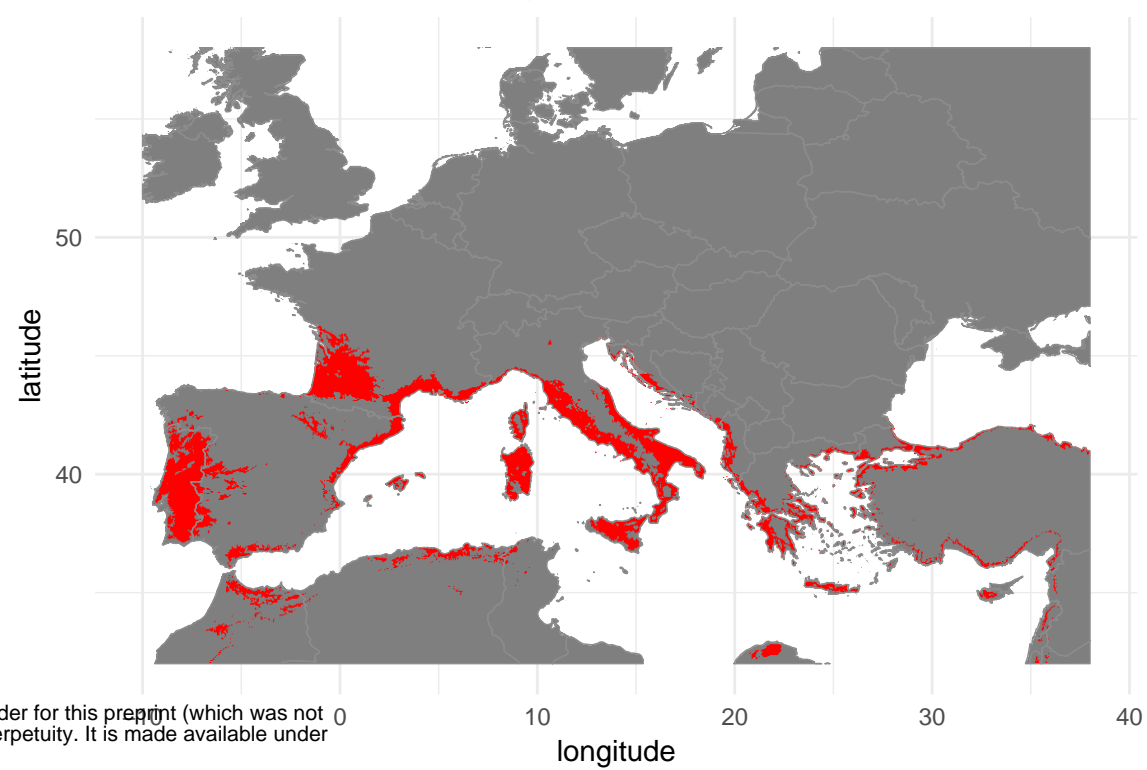**B**

Habitat suitability 2050 [scenario 4.5]

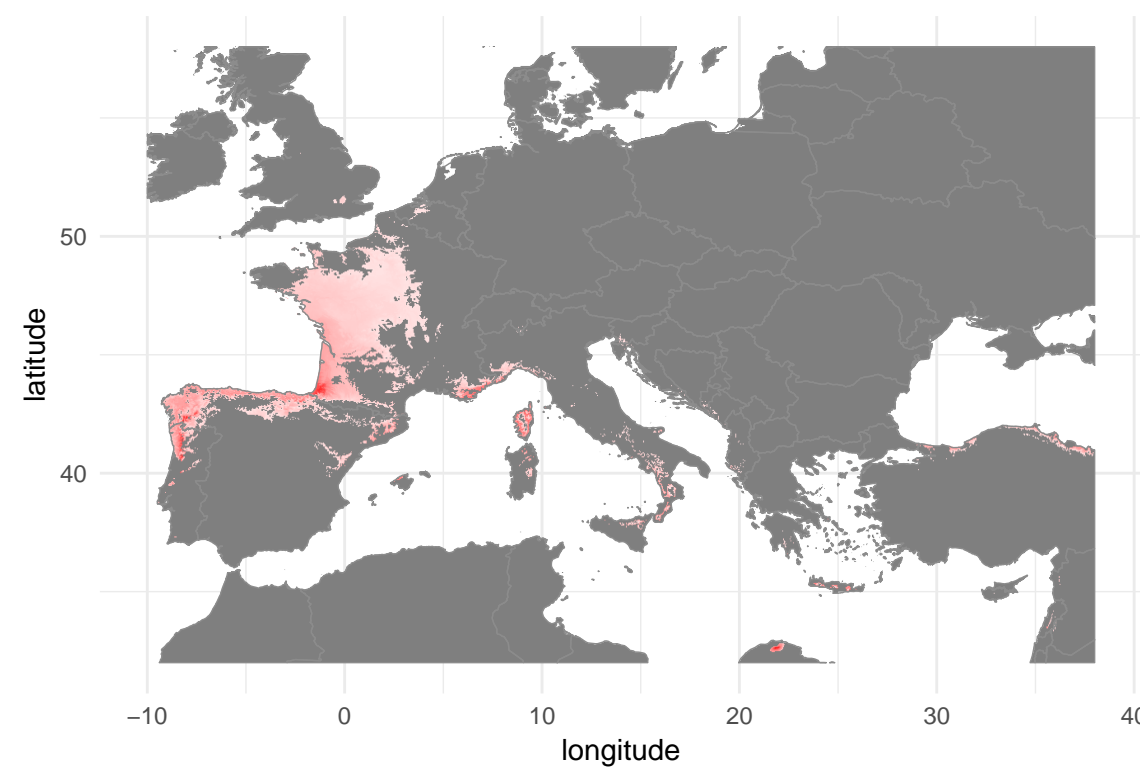**E**

Proportion of models predicting presence 2050 [scenario 4.5]

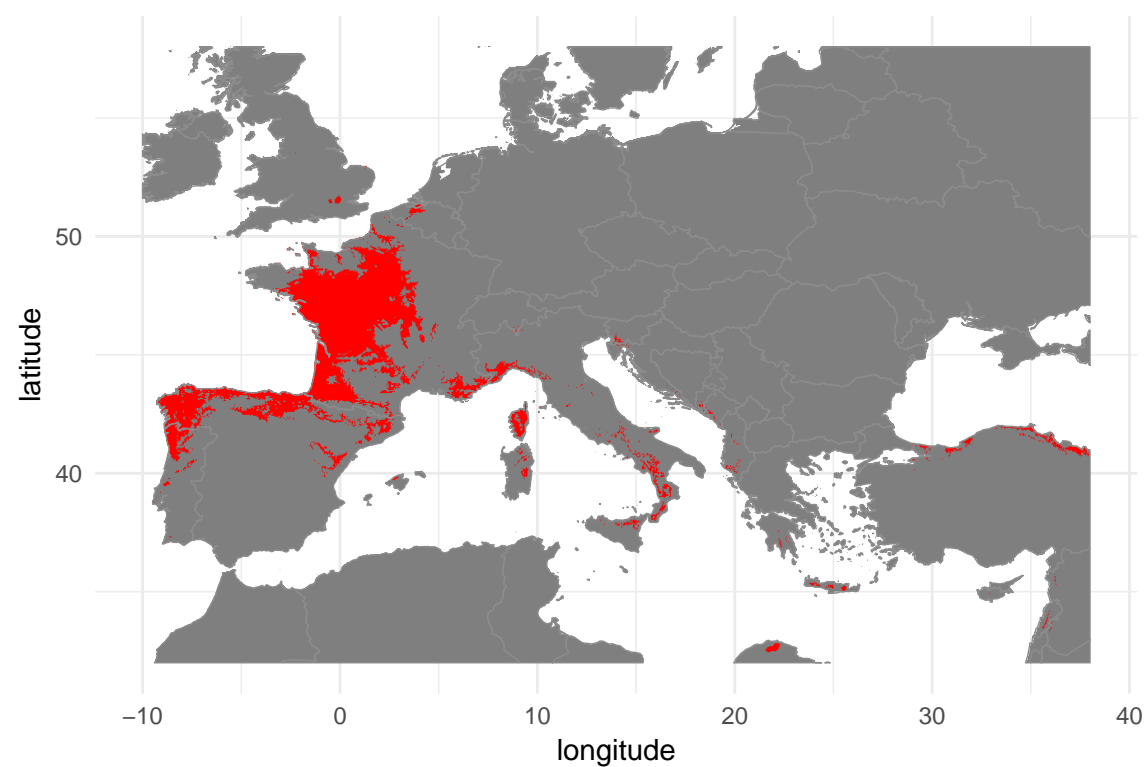**C**

Habitat suitability 2050 [scenario 8.5]

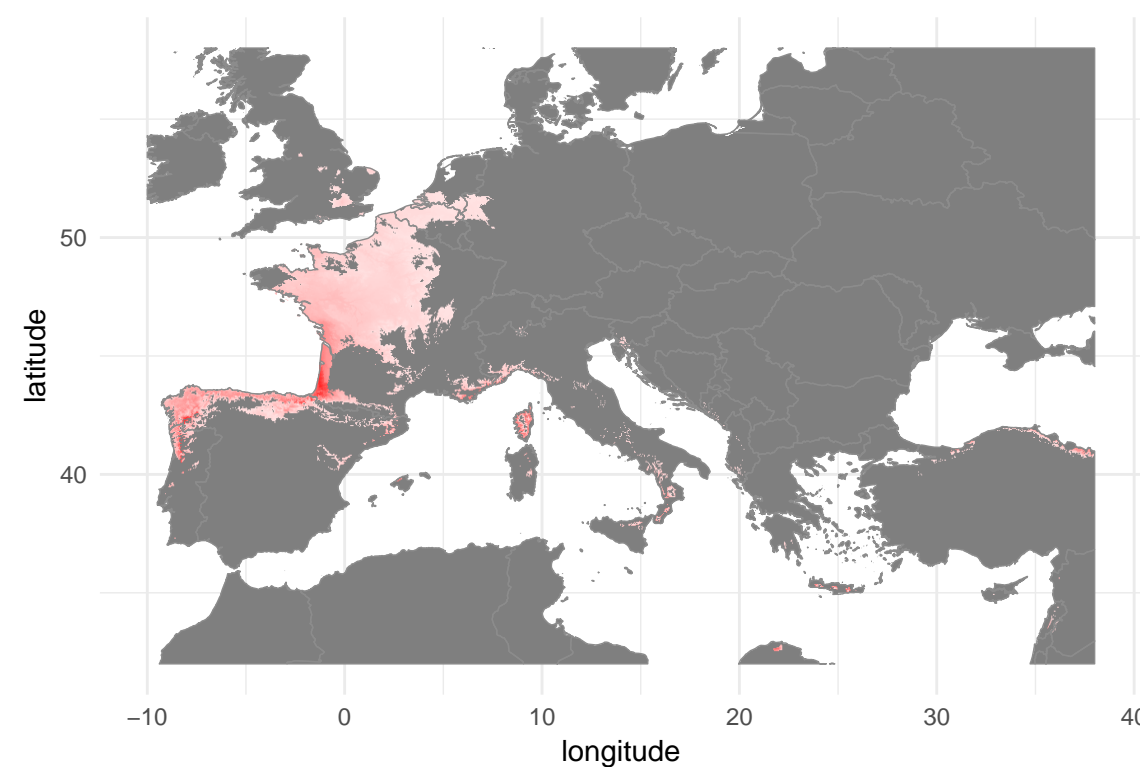**F**

Proportion of models predicting presence 2050 [scenario 8.5]

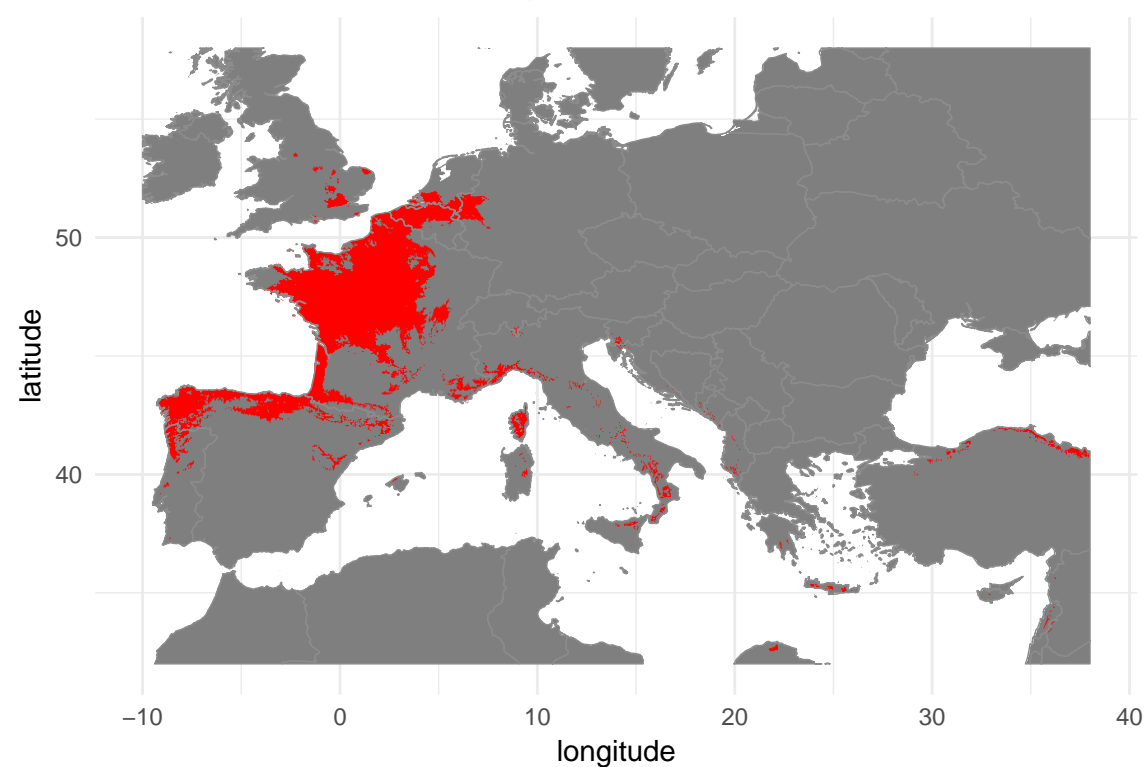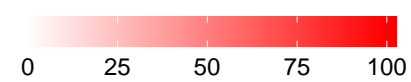

Source: https://www.biorxiv.org/content/10.1101/289876v1.full.pdf
